# Supplementary material
Source: MDPI journal article supplement (https://www.mdpi.com/1424-2818/13/12/624)

Figure S3 Predicted species distribution of orchids found in Armenia using the MaxEnt model. Warmer colours show areas with better predicted conditions. White dots are presence locations used for training, while violet dots are points used for testing. Response curves are shown for each species. Bio5 = Max temperature of warmest month; Bio17 = Precipitation of driest quarter; Bio18 = Precipitation of warmest quarter and Alt = altitude

*Anacamptis coriophora*

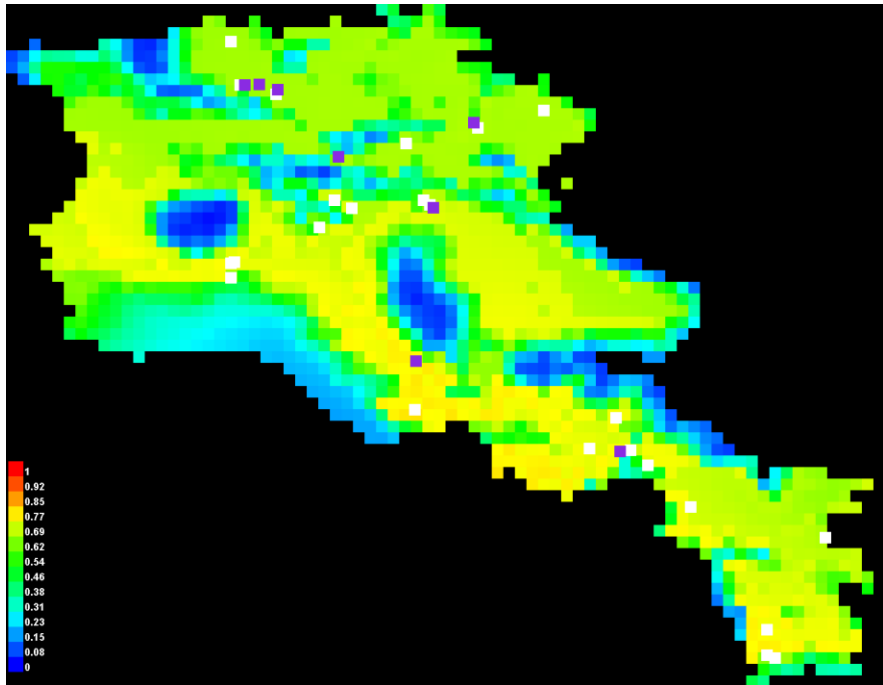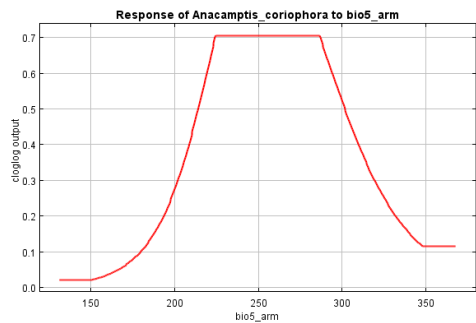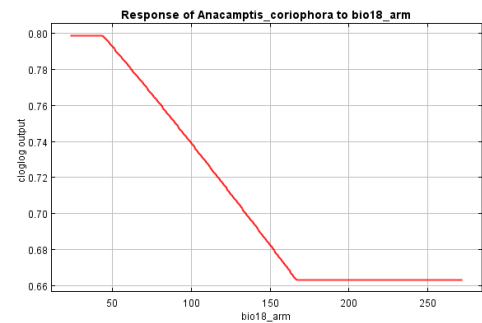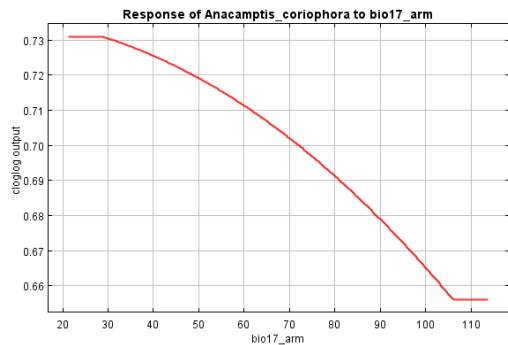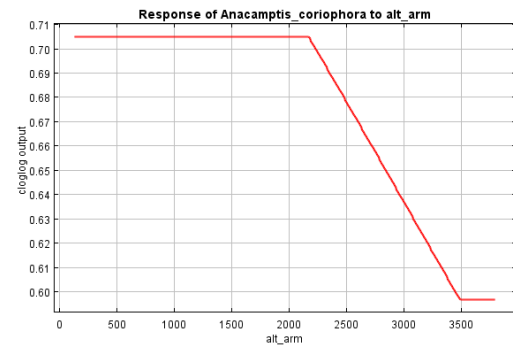

*Cephalanthera longifolia*

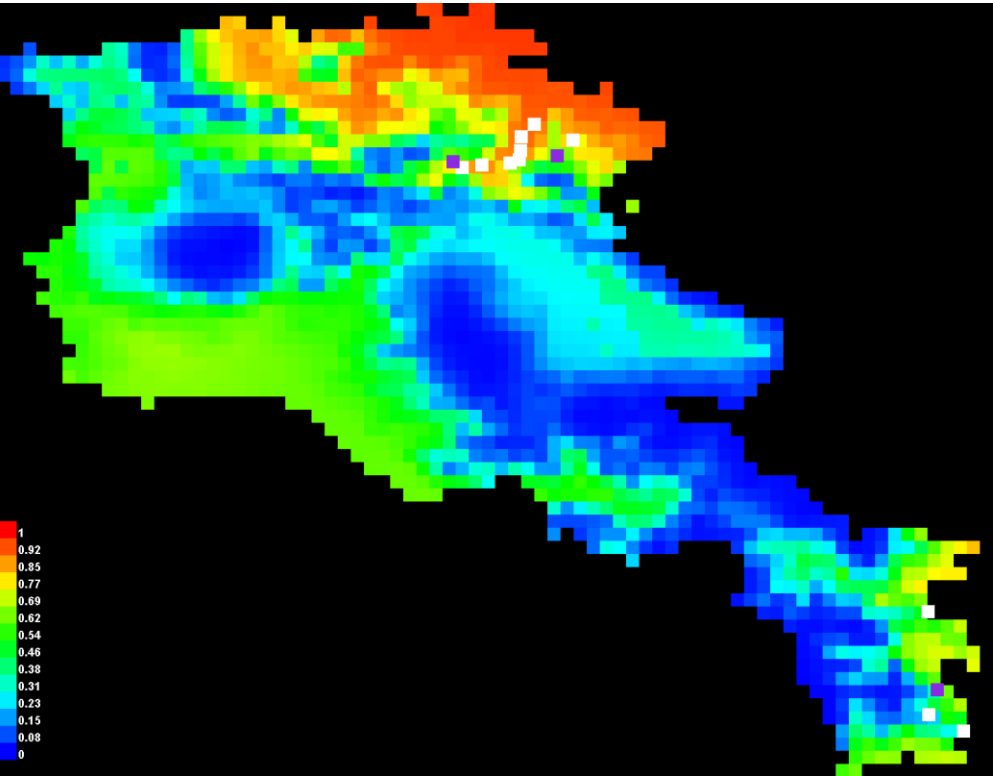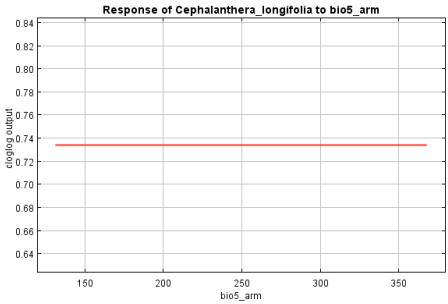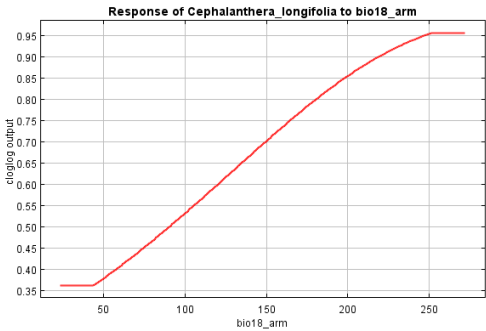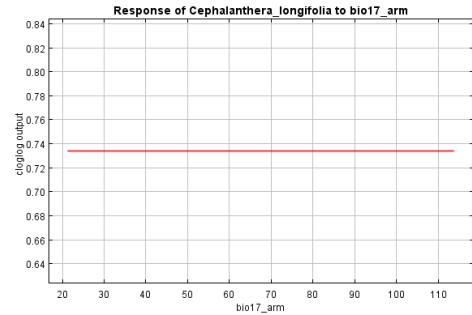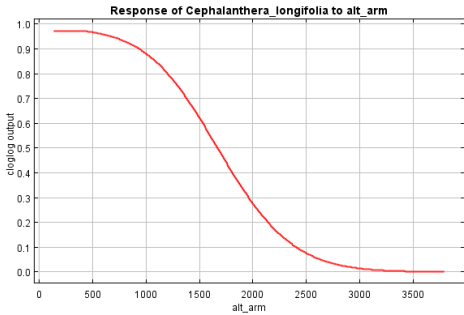

*Dactylorhiza viridis*

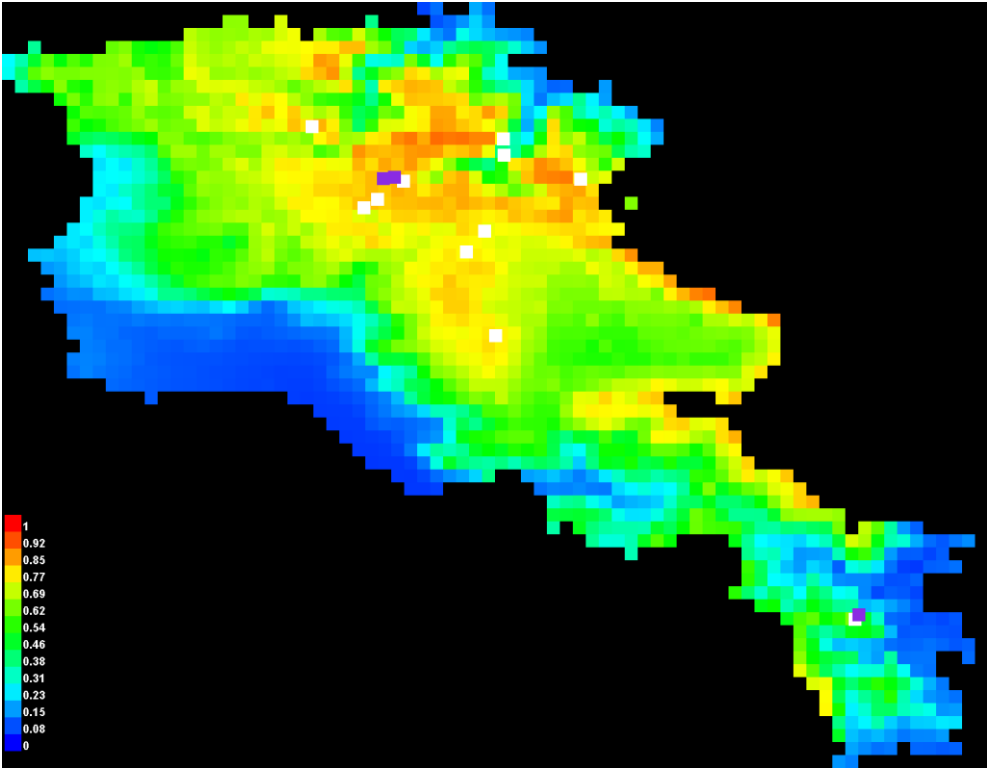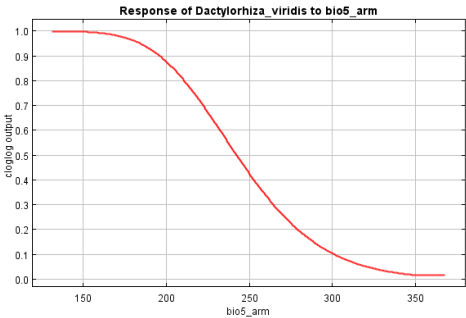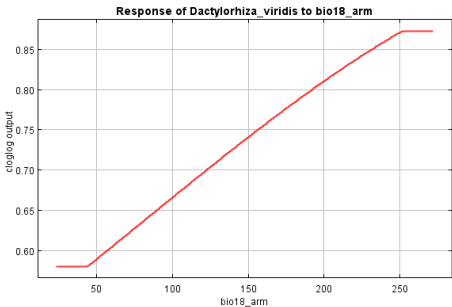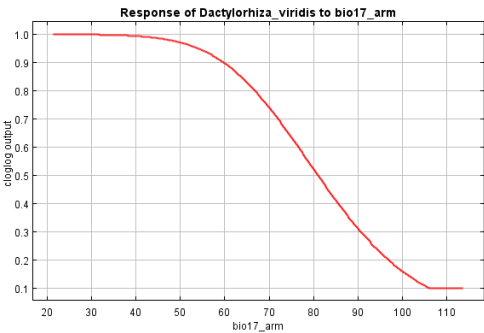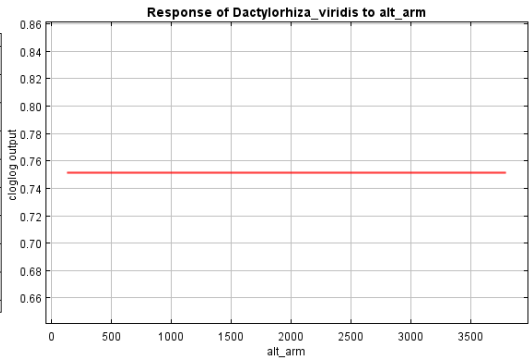

*Epipactis helleborine*

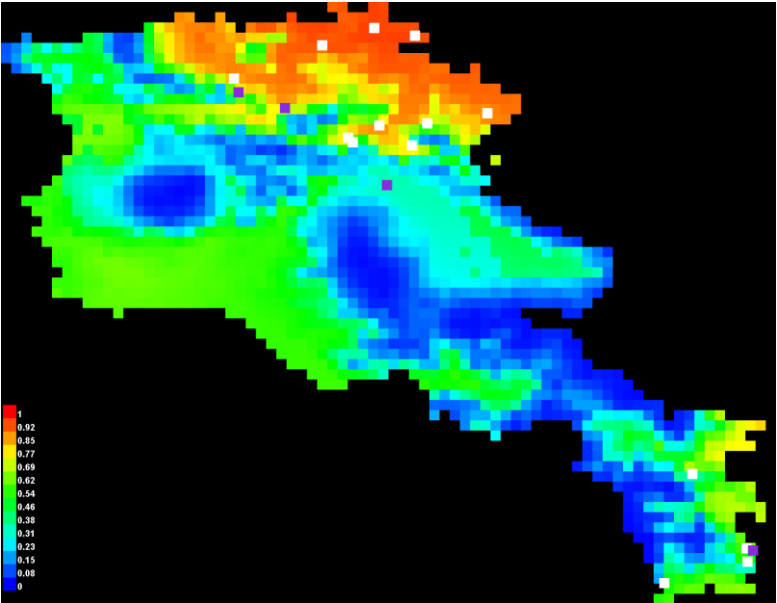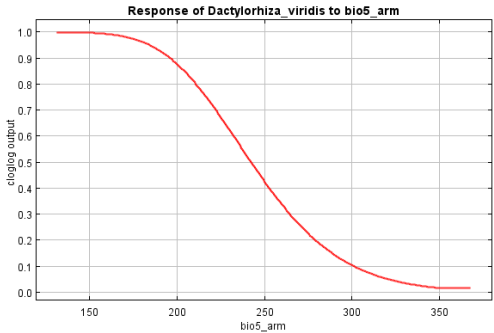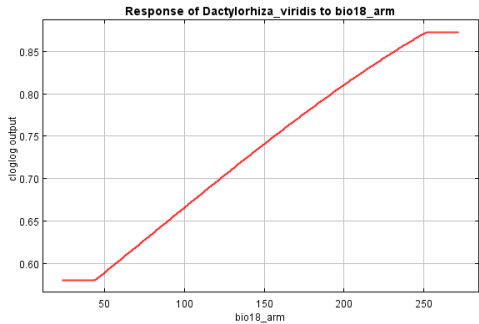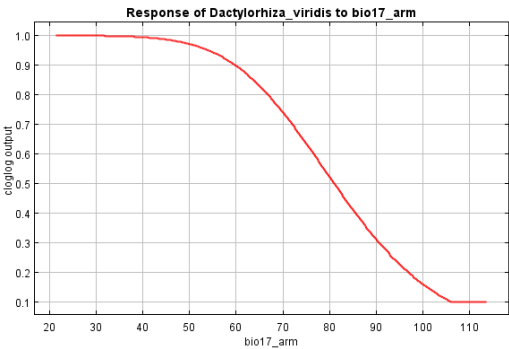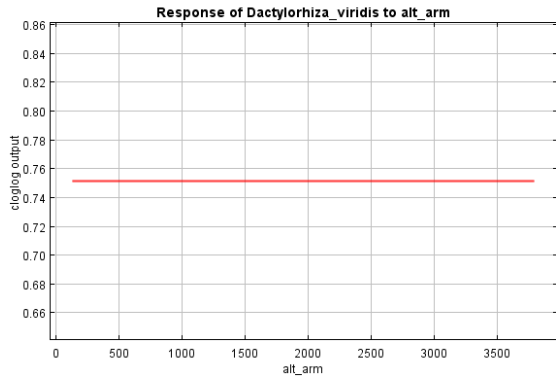

*Limodorum abortivum*

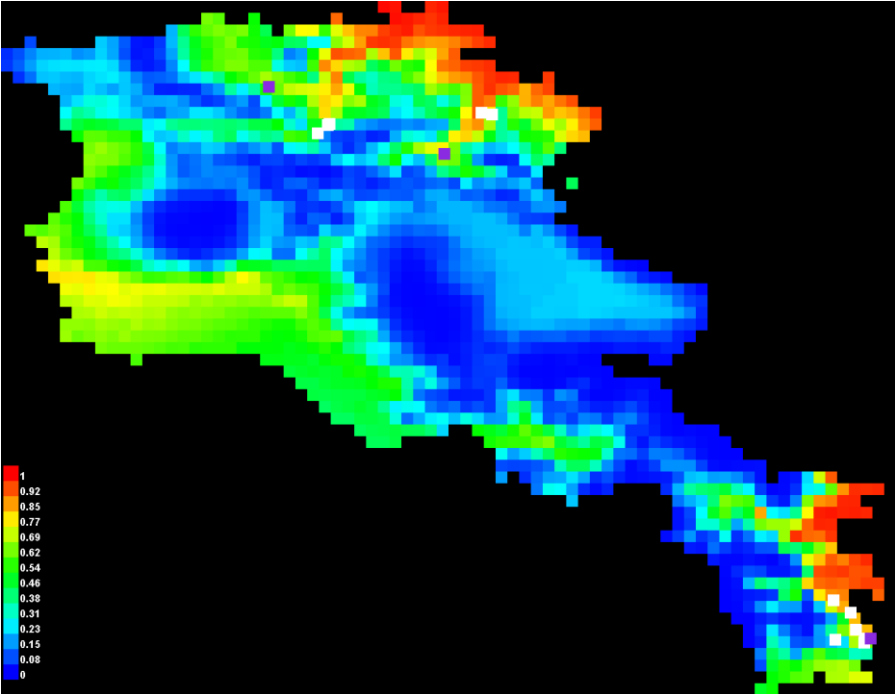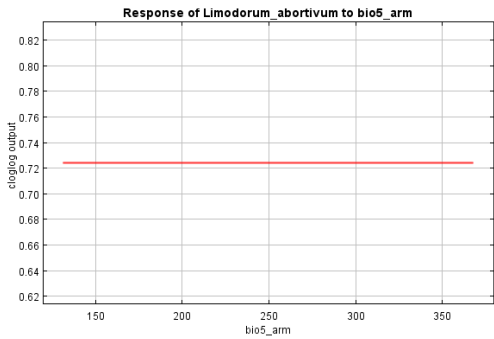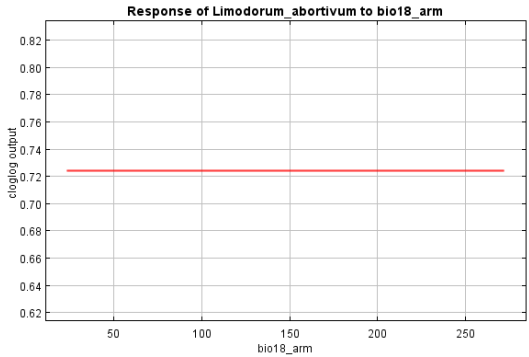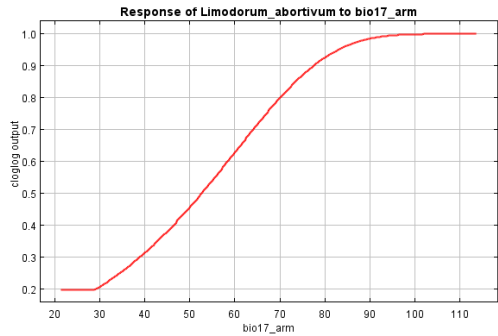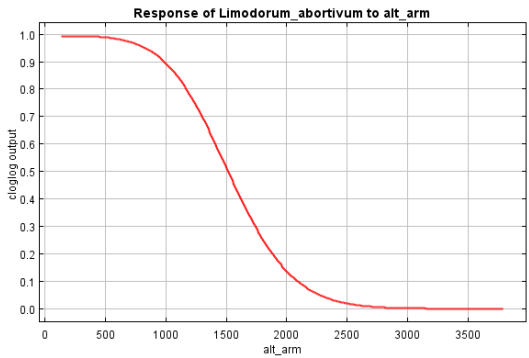

*Ophrys scolopax subsp. cornuta*

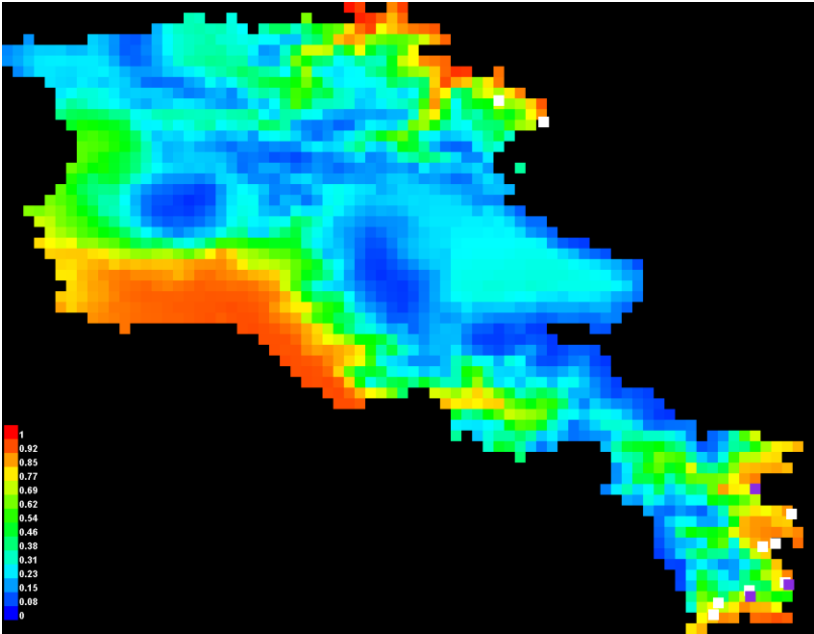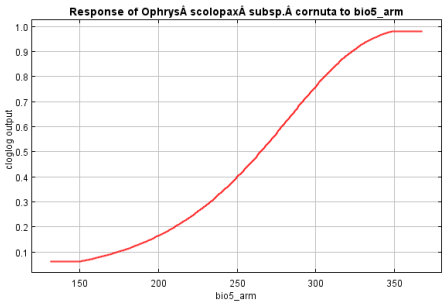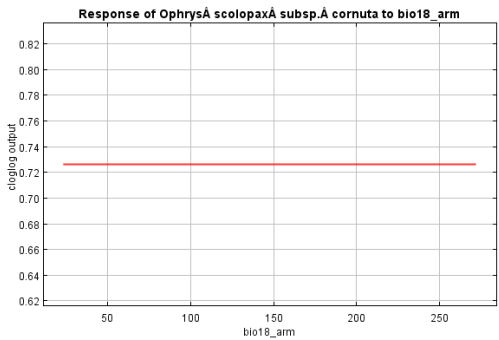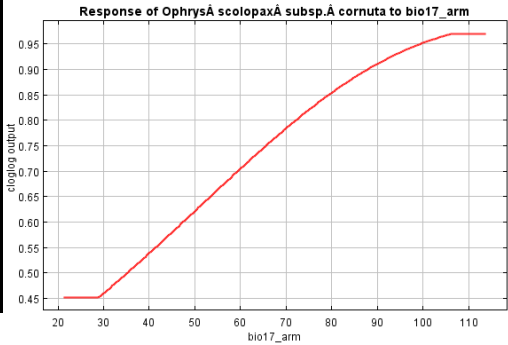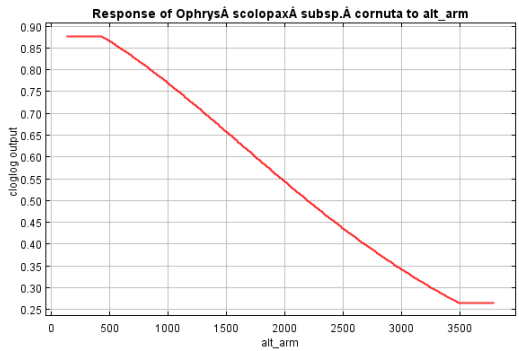

*Orchis punctulata*

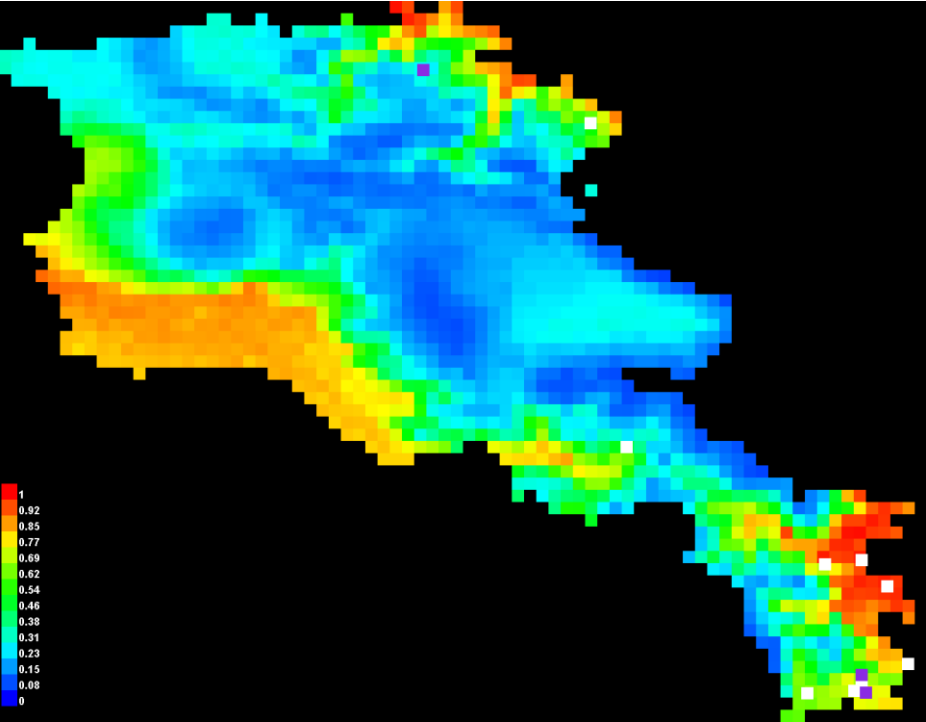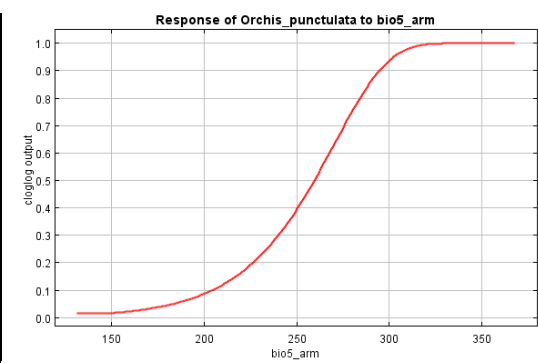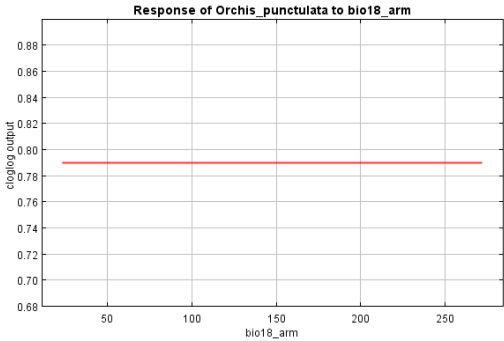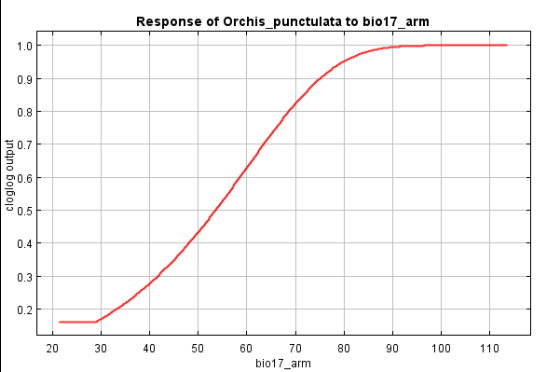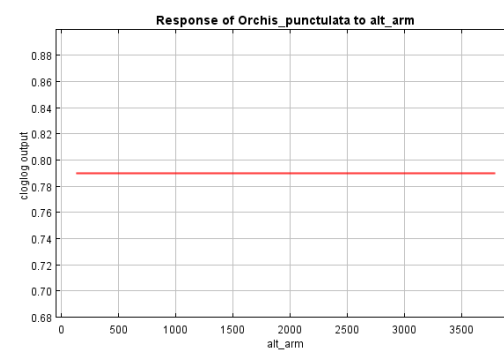

*Traunsteinera sphaerica*

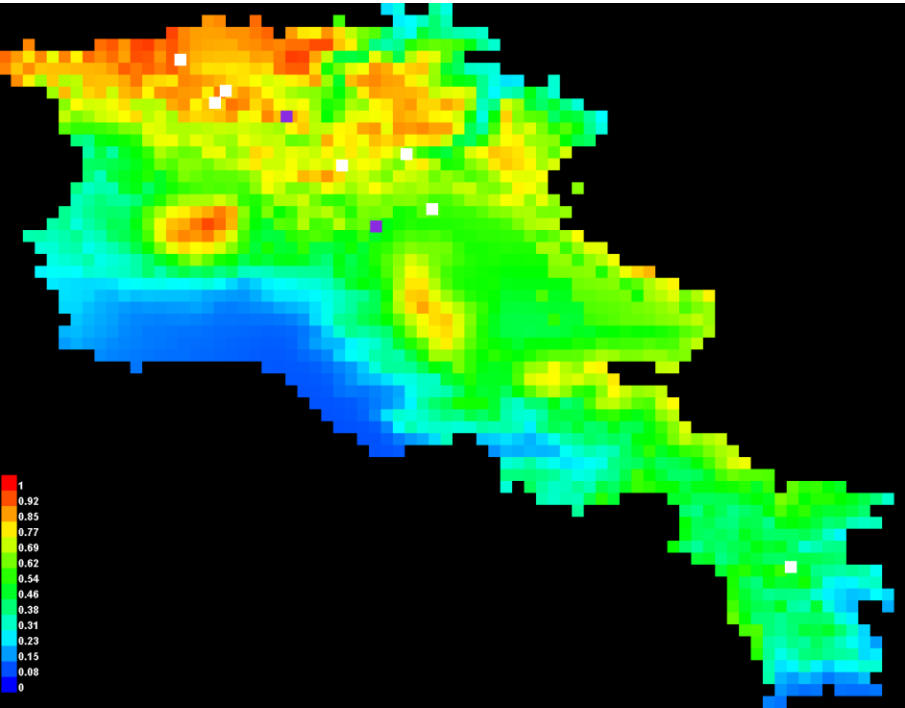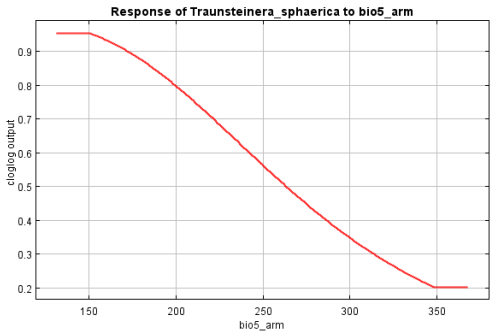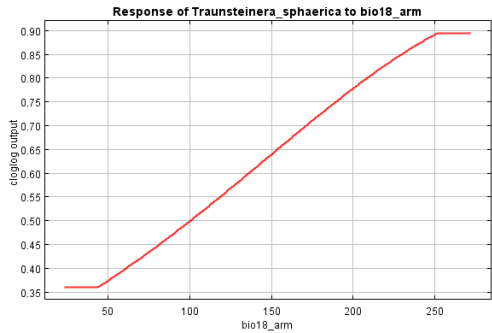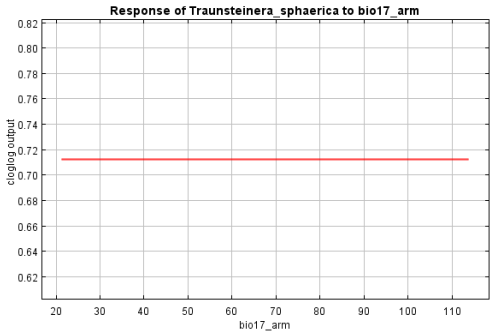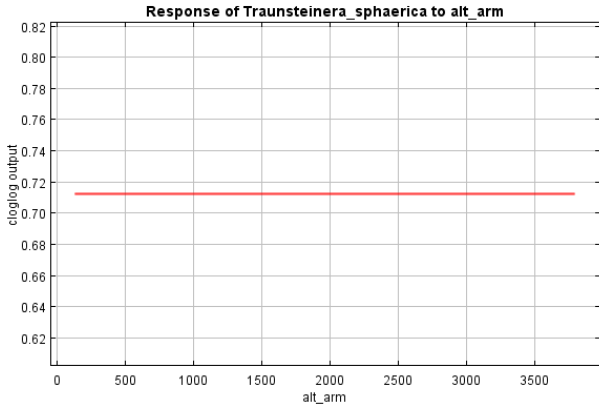



*Cephalanthera damasonium*

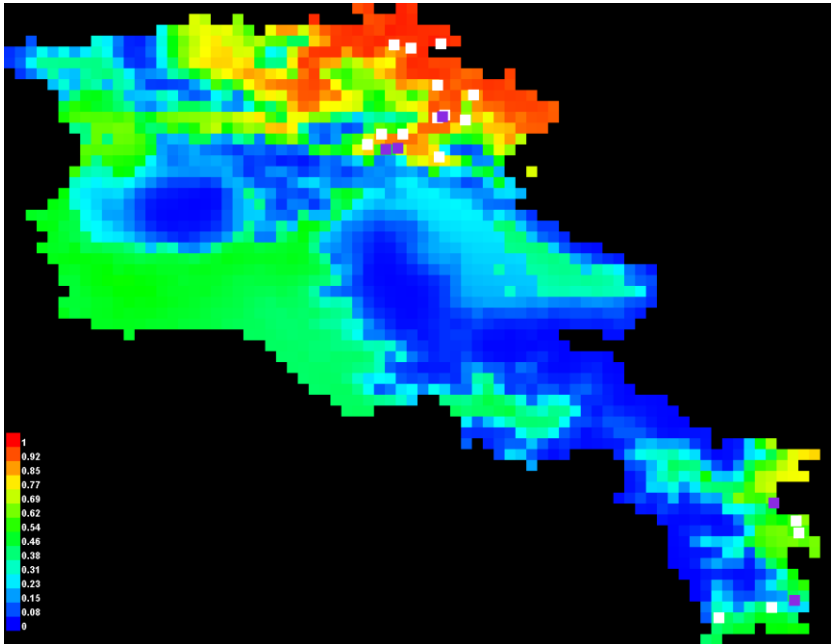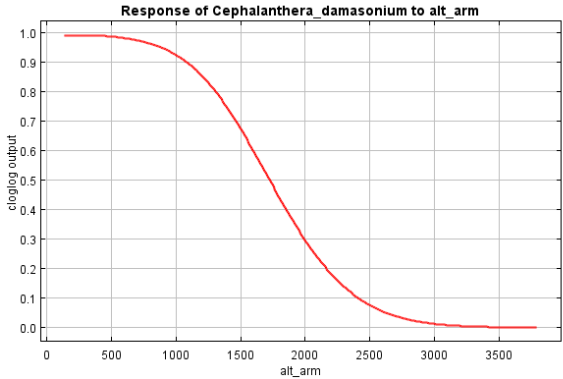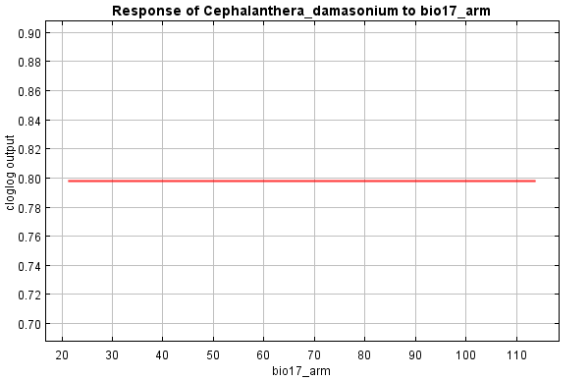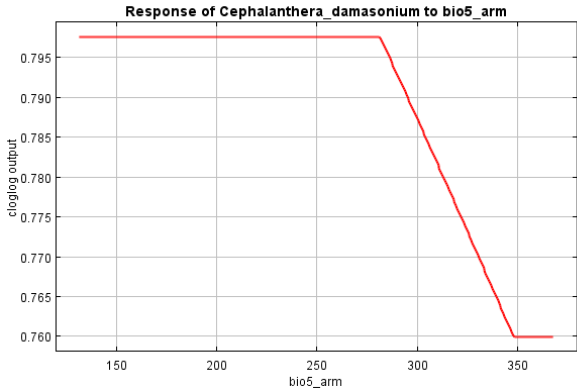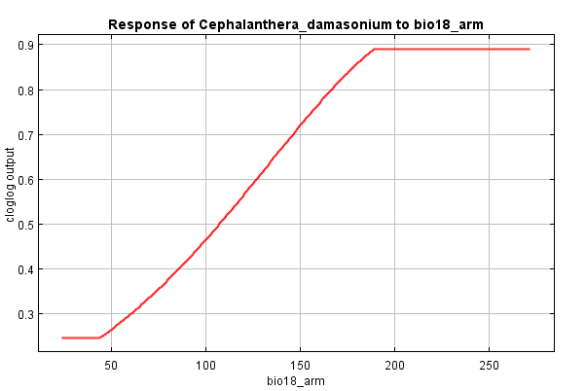

*Dactylorhiza euxina*

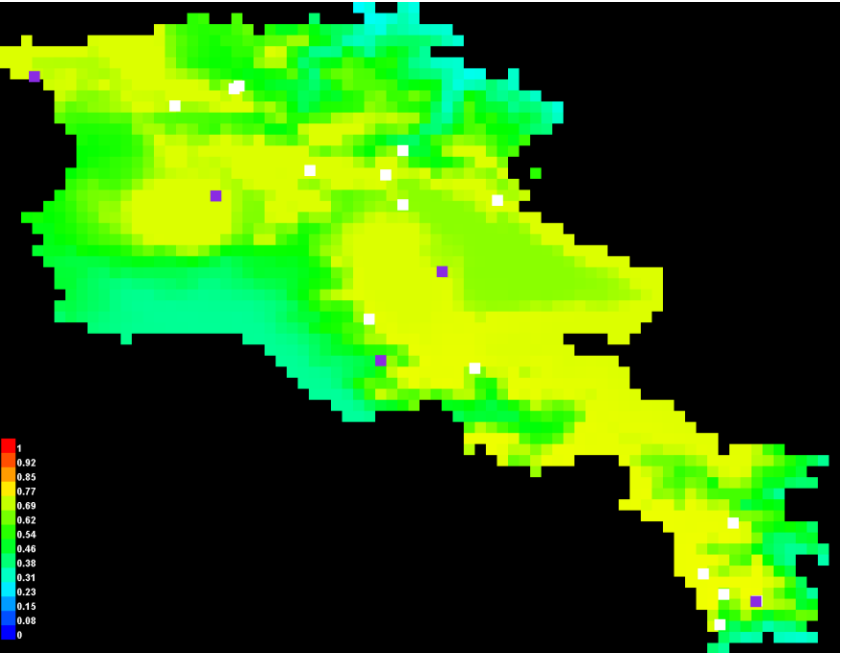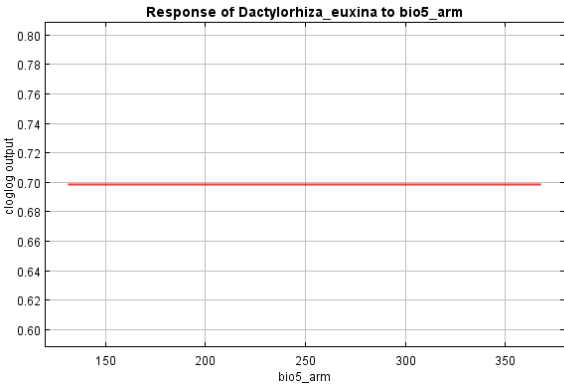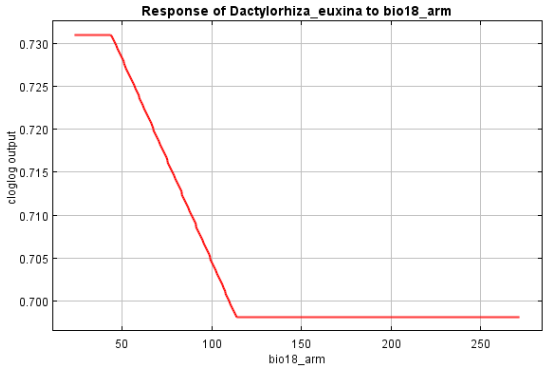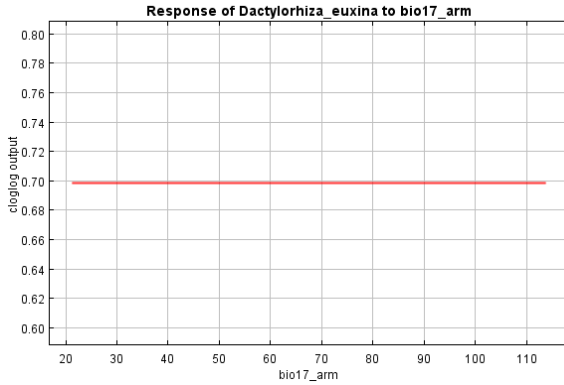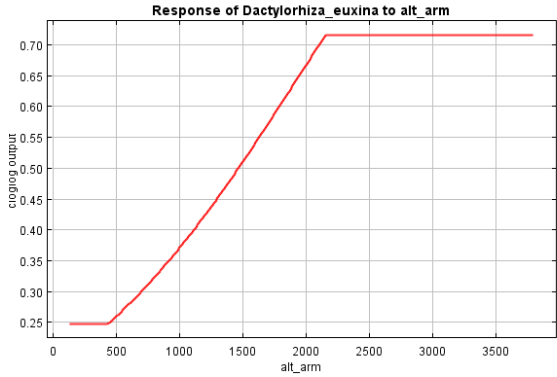

*Neotinea tridentata*

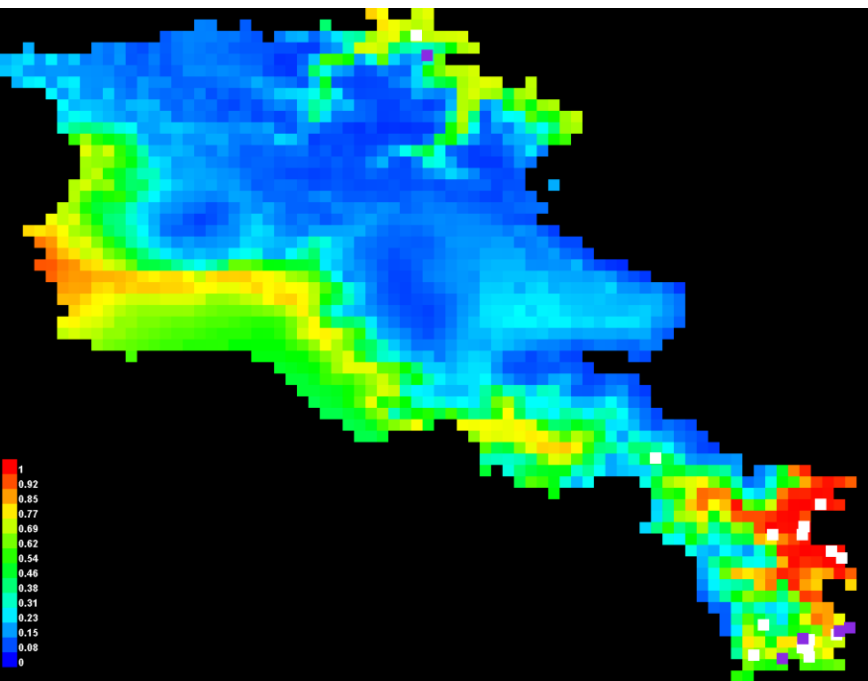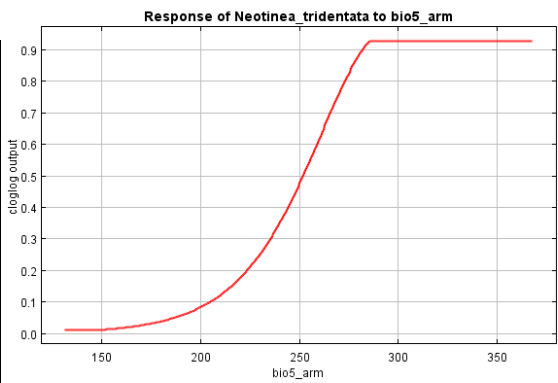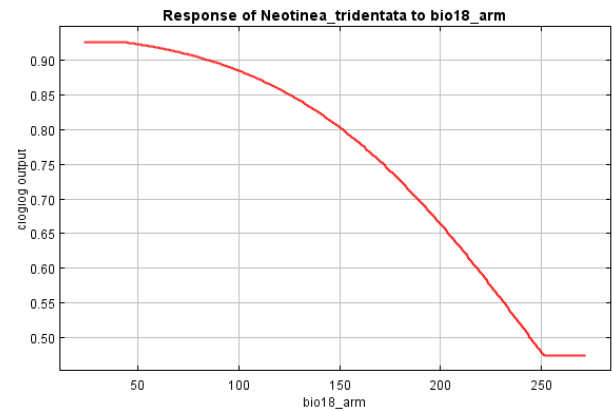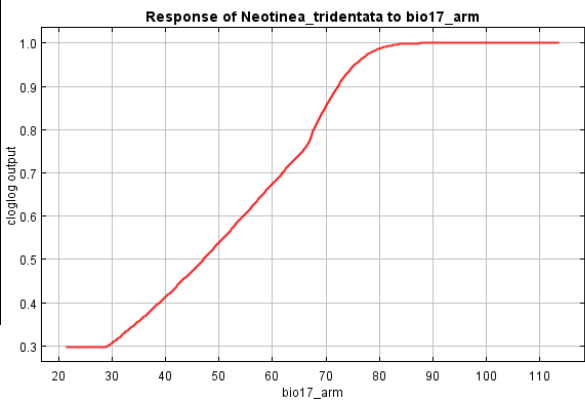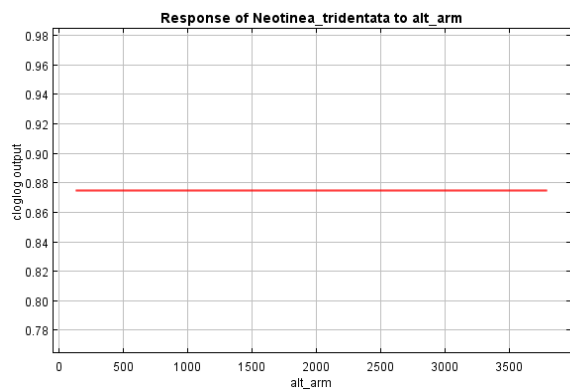

*Neottia nidus-avis*

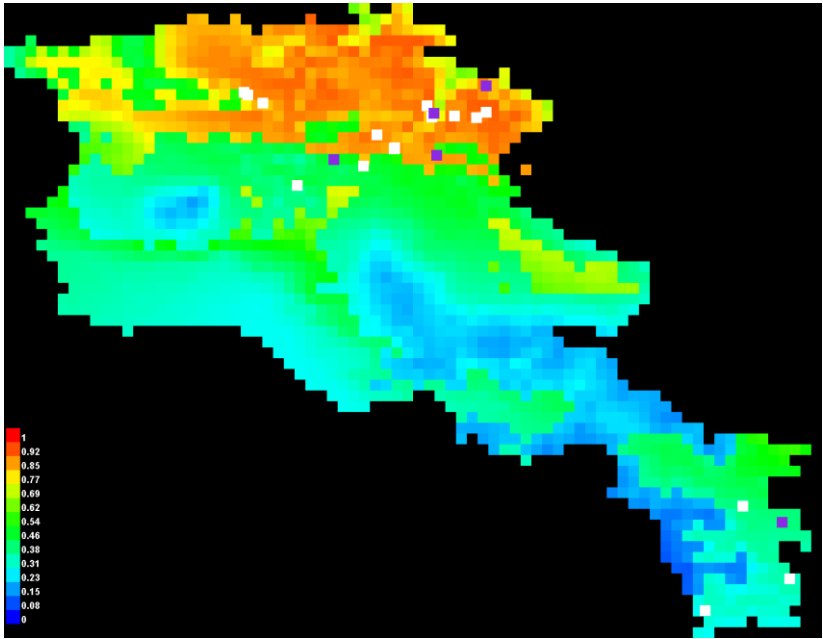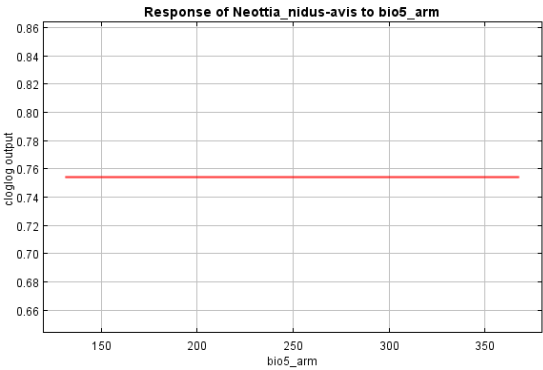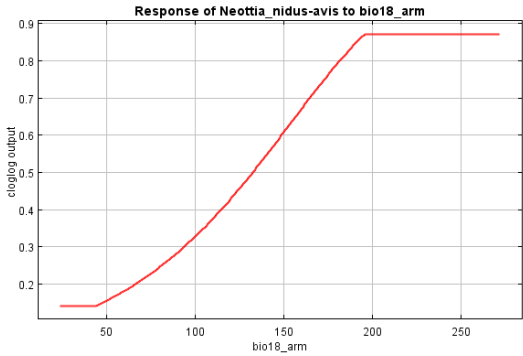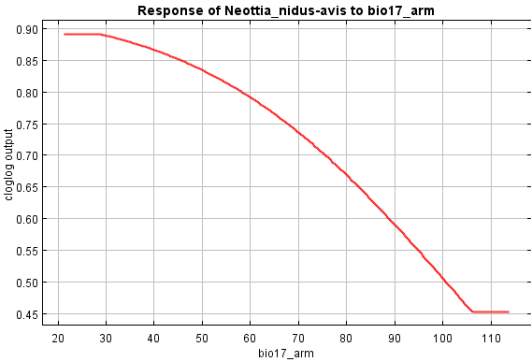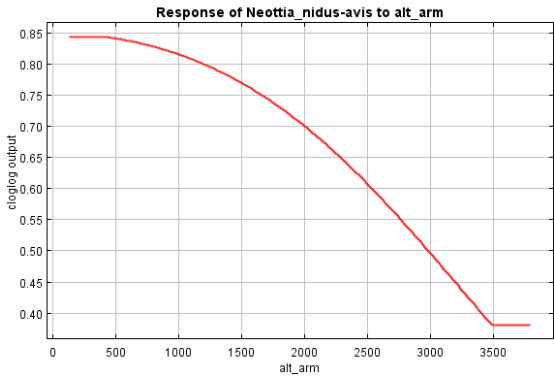

*Orchis mascula*

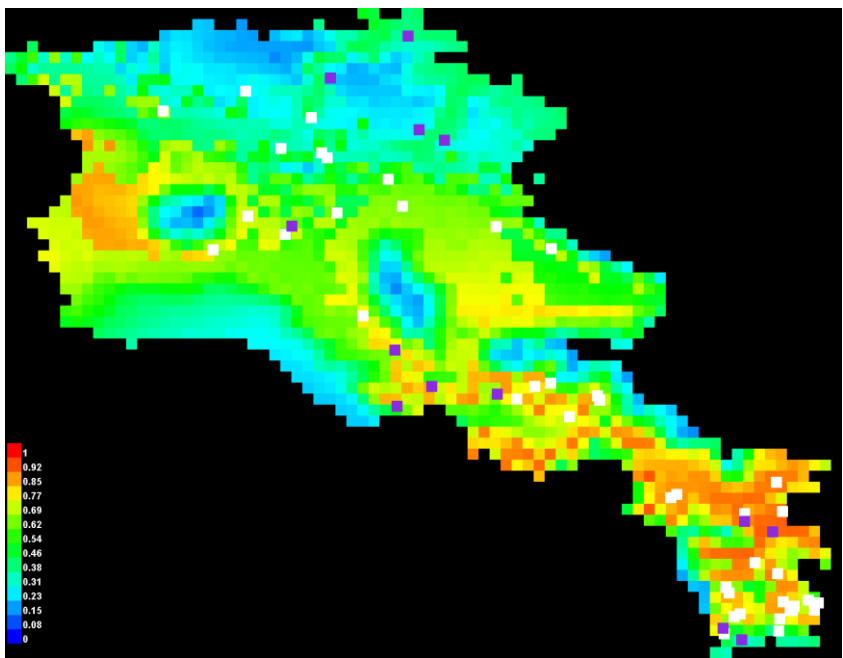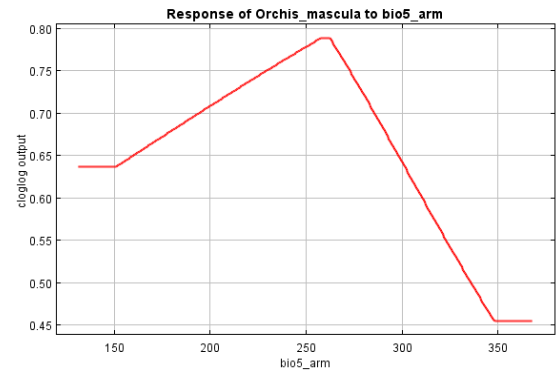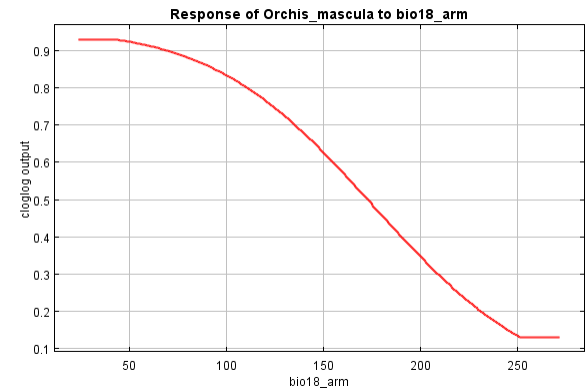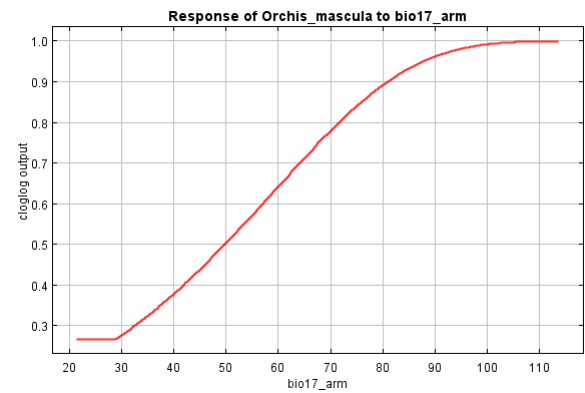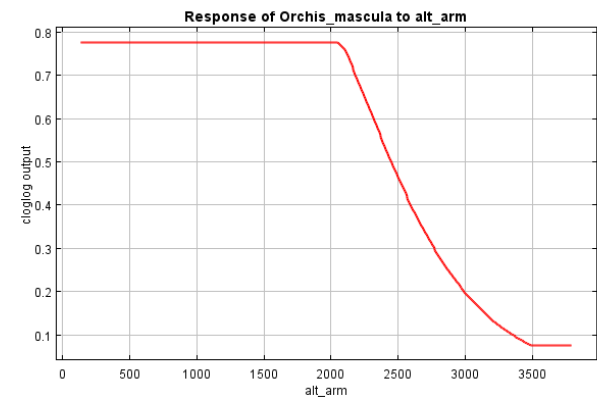

*Orchis purpurea*

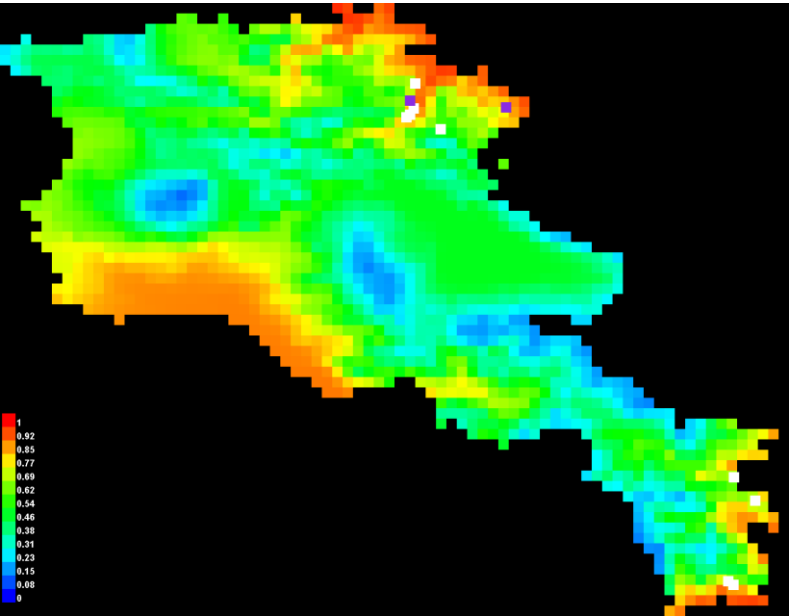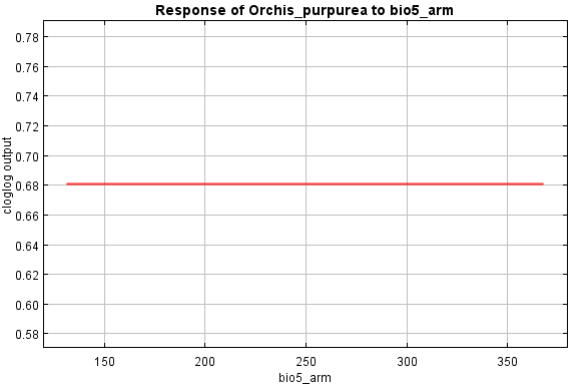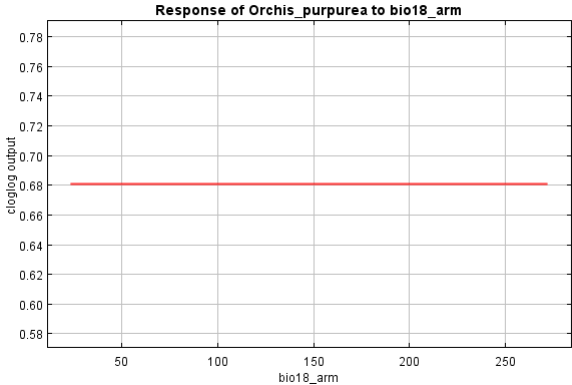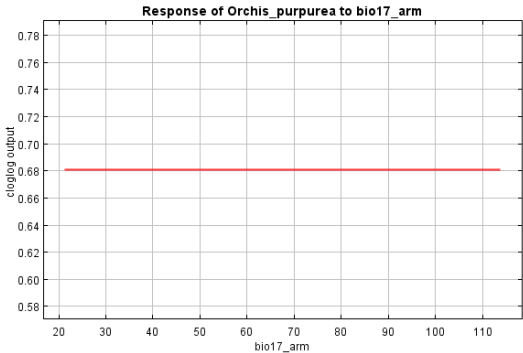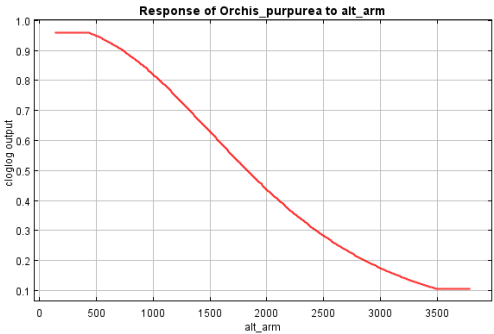

*Cephalanthera rubra*

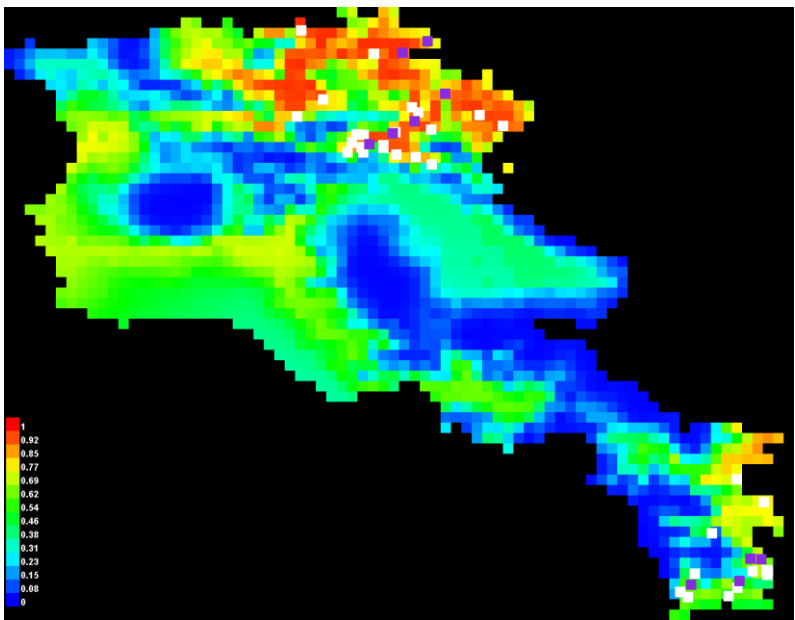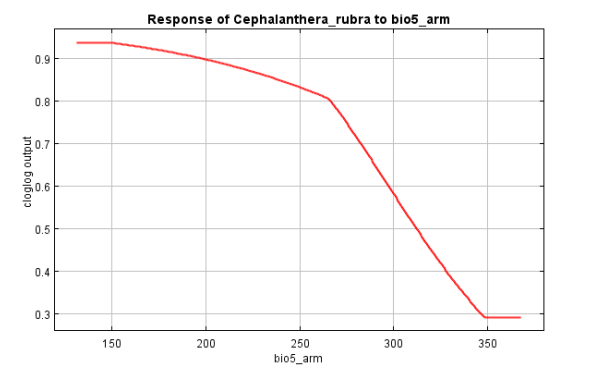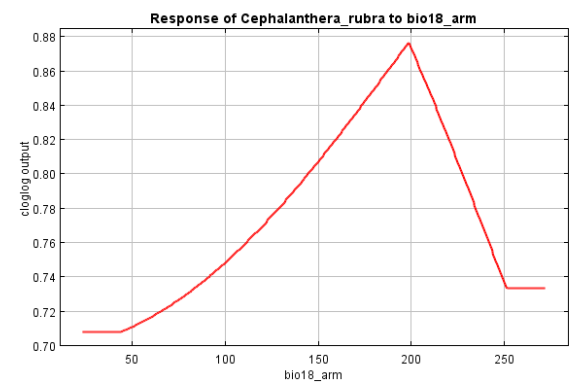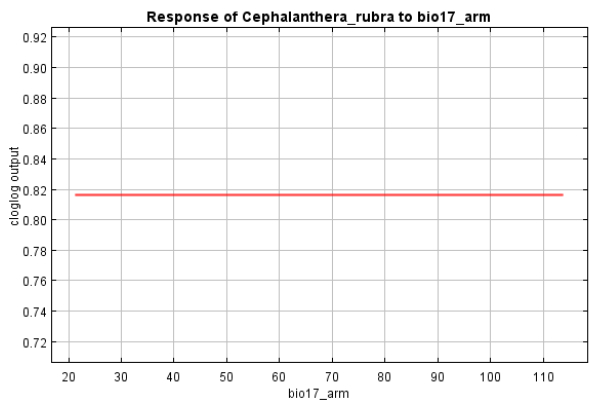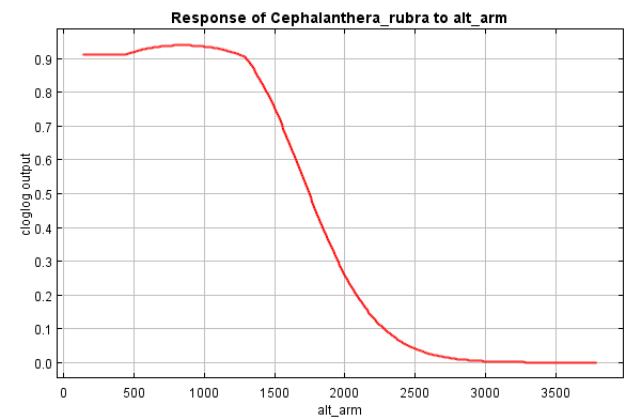

*Dactylorhiza incarnata* subsp. *cilicica*

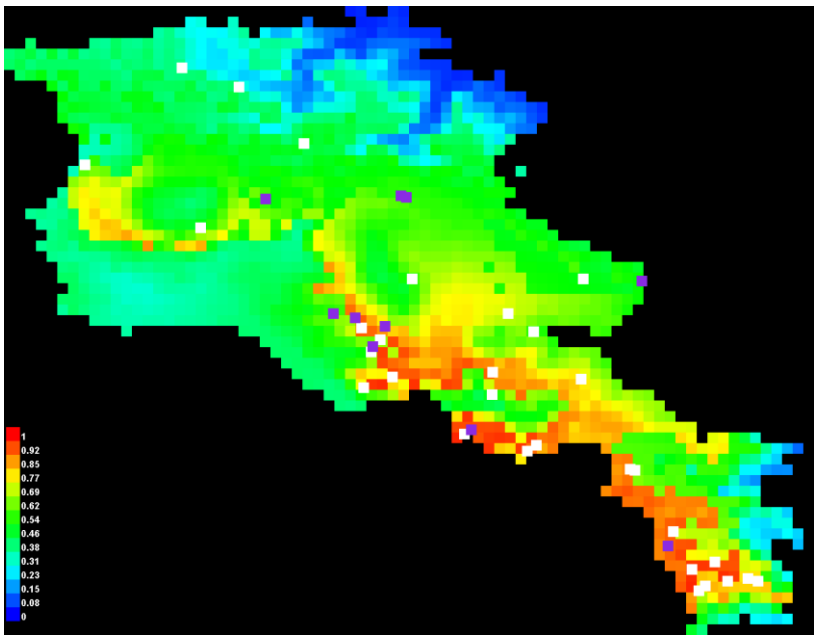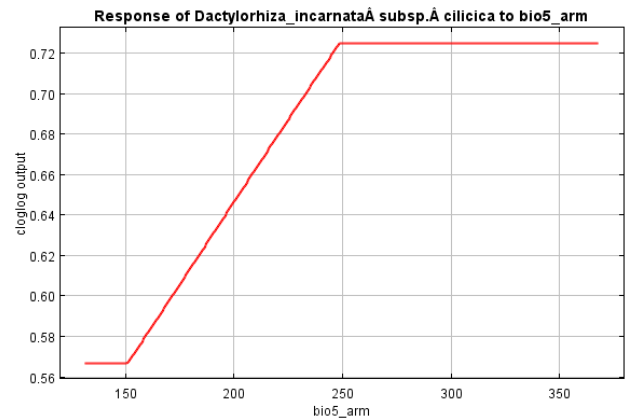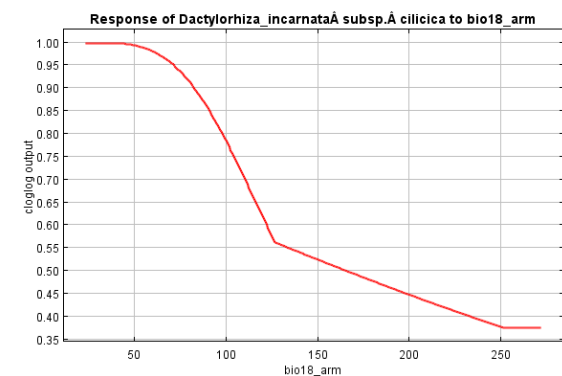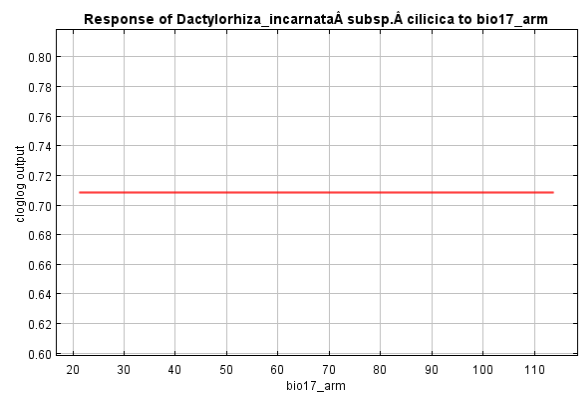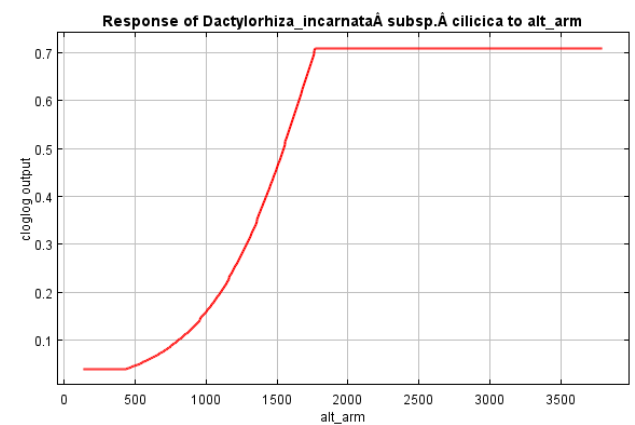



*Epipactis persica*

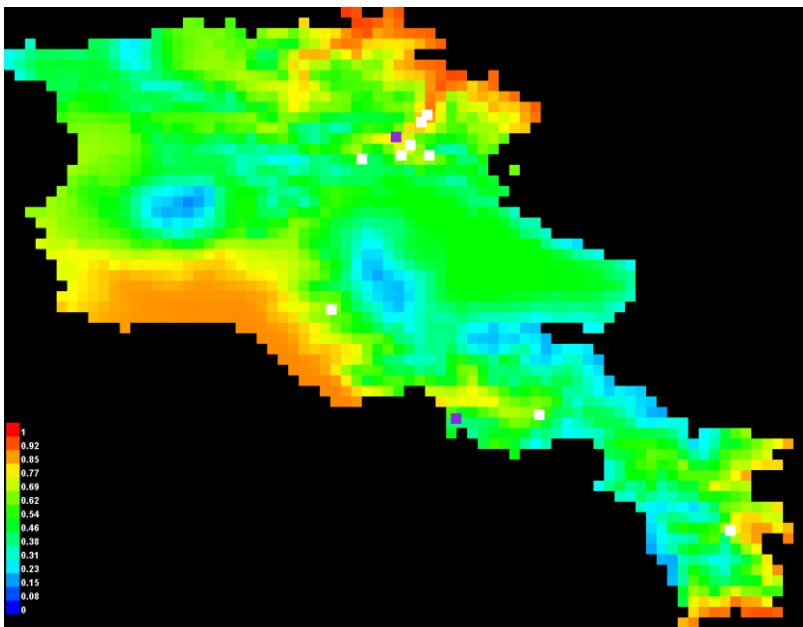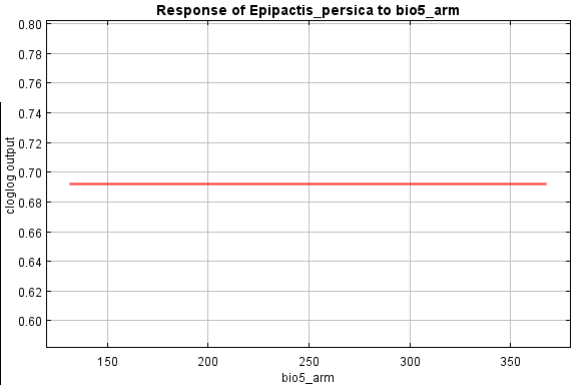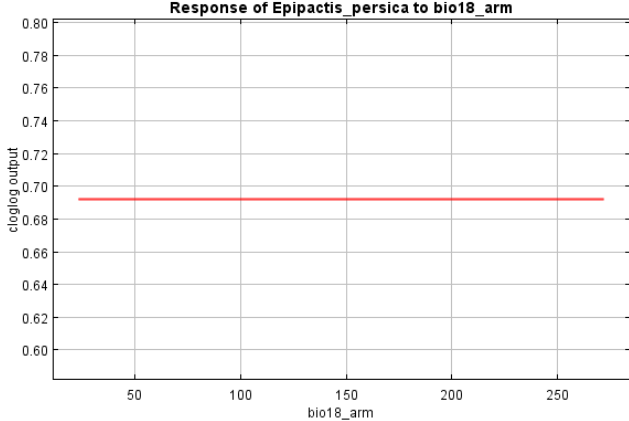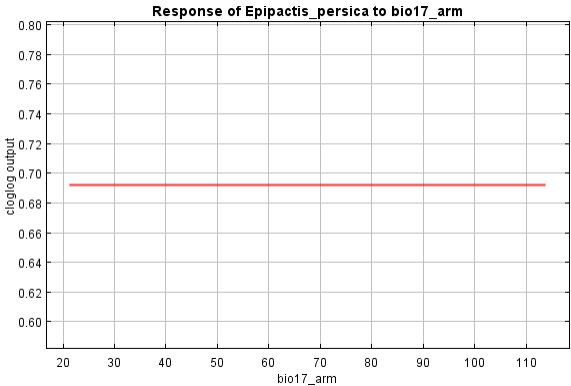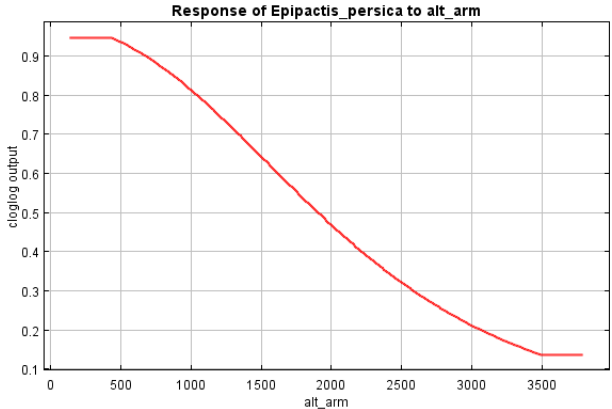

*Gymnadenia conopsea*

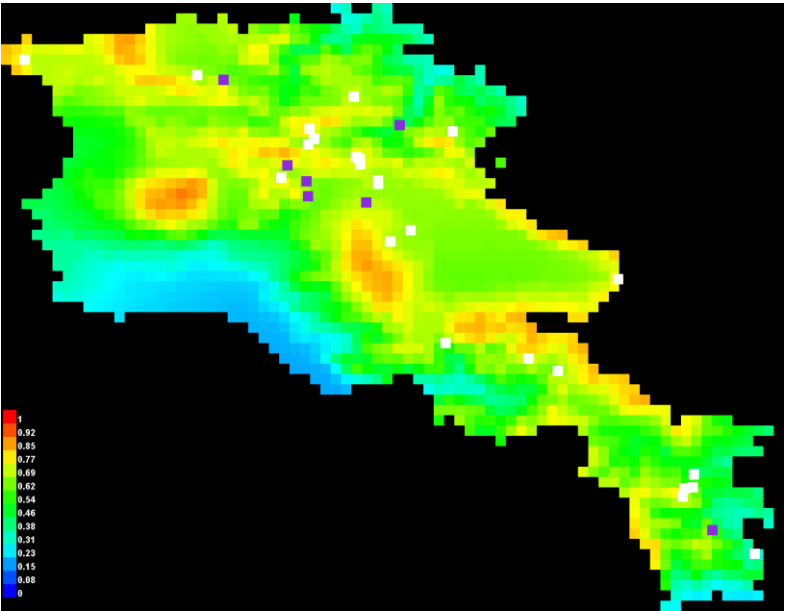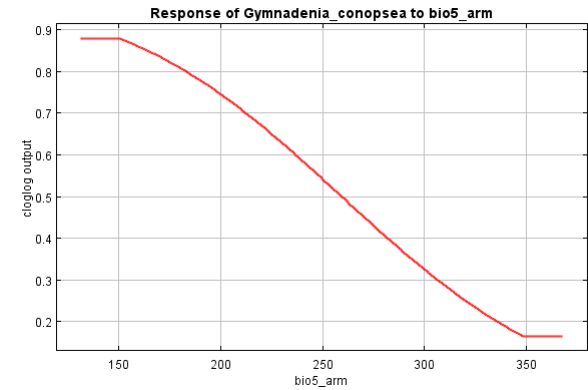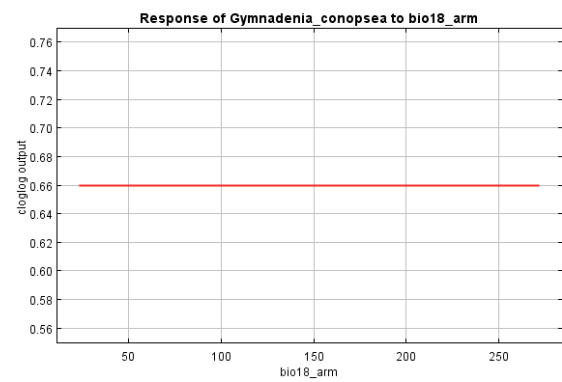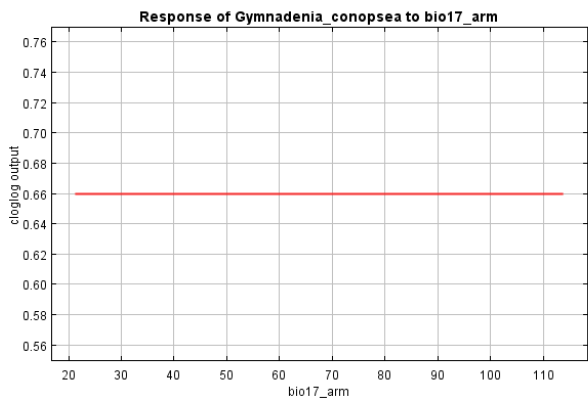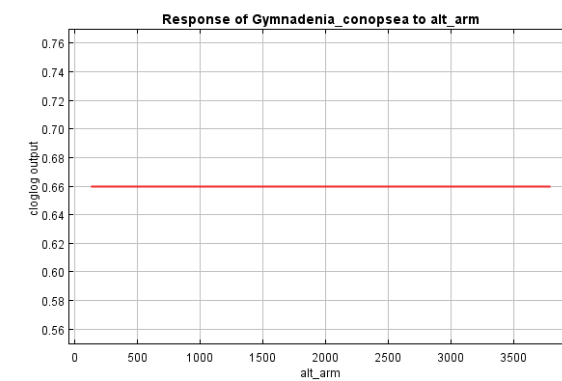

*Platanthera chlorantha*

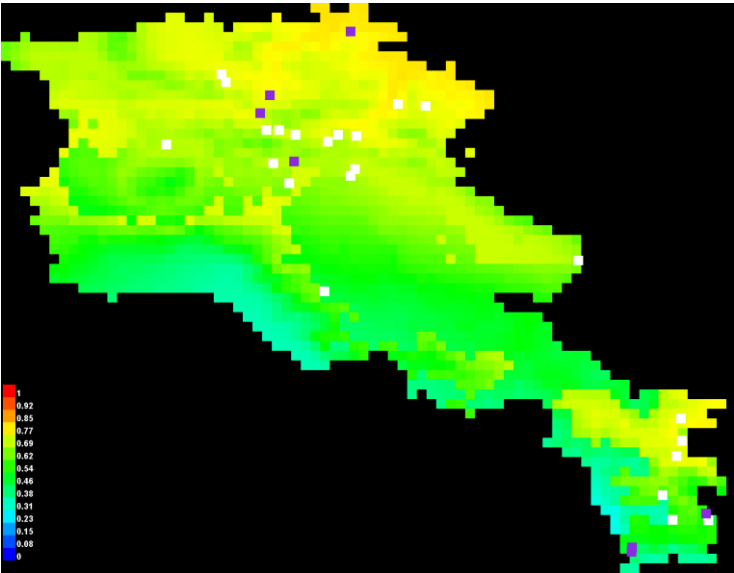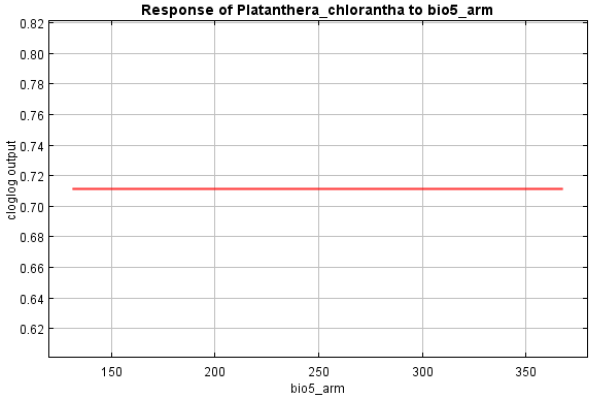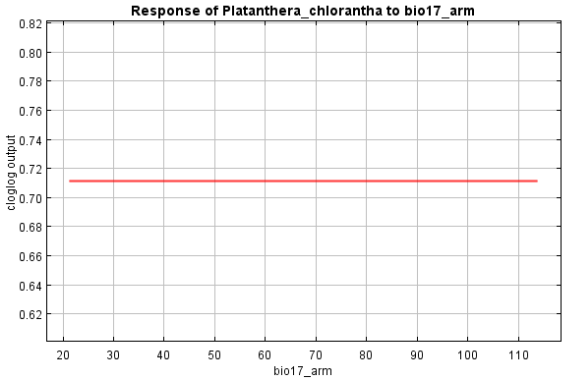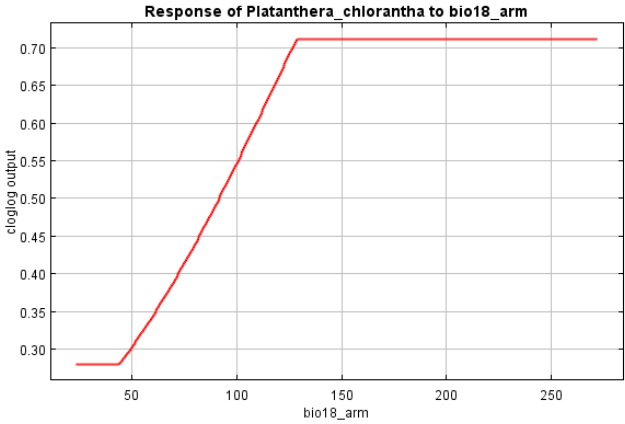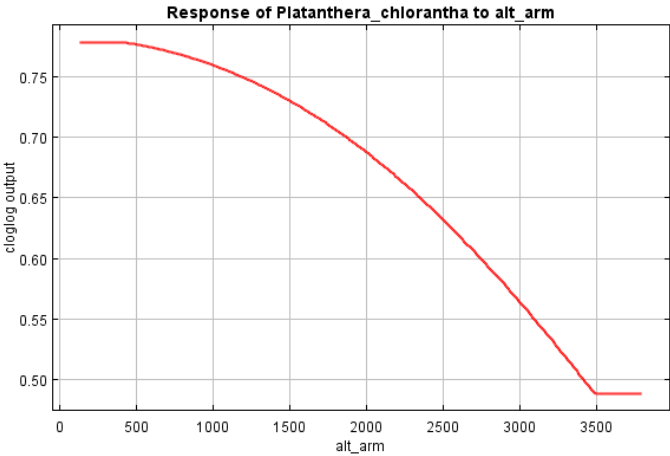

# *Anacamptis pyramidalis*

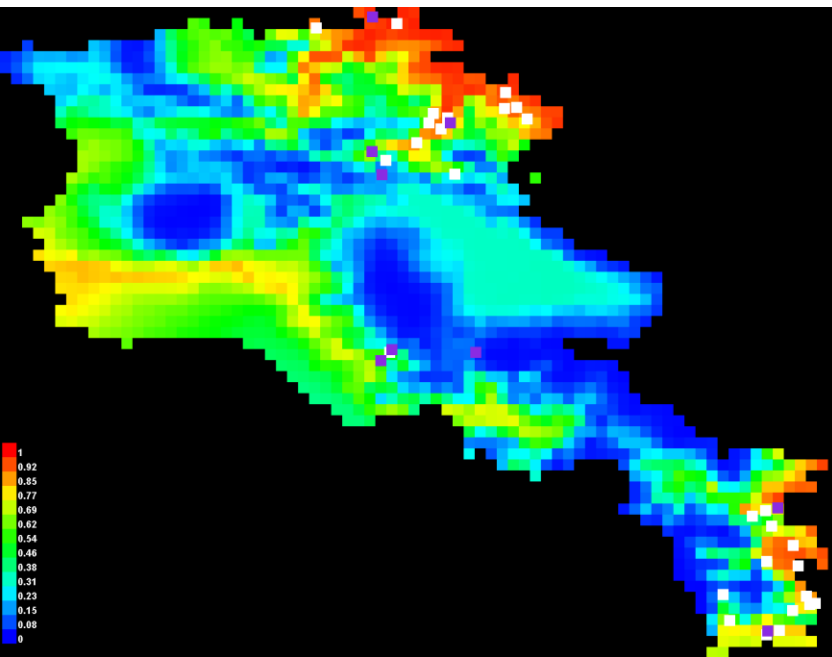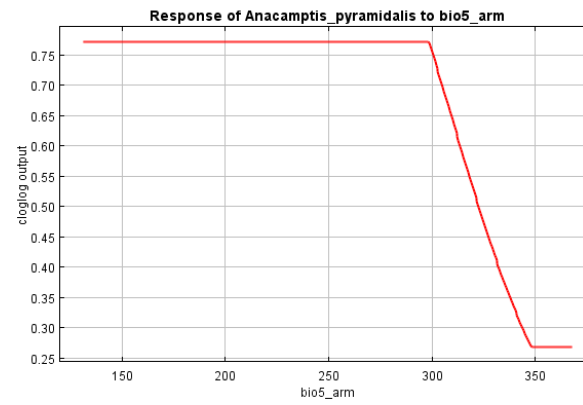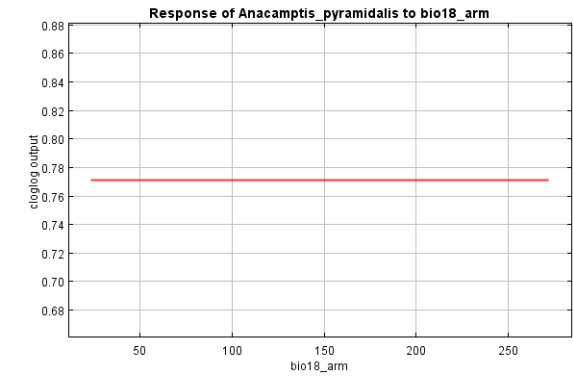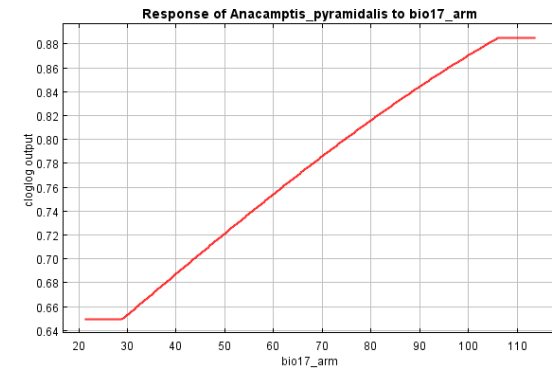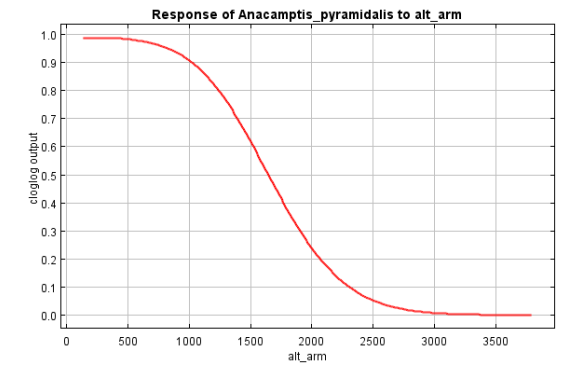

*Dactylorhiza urvilleana*

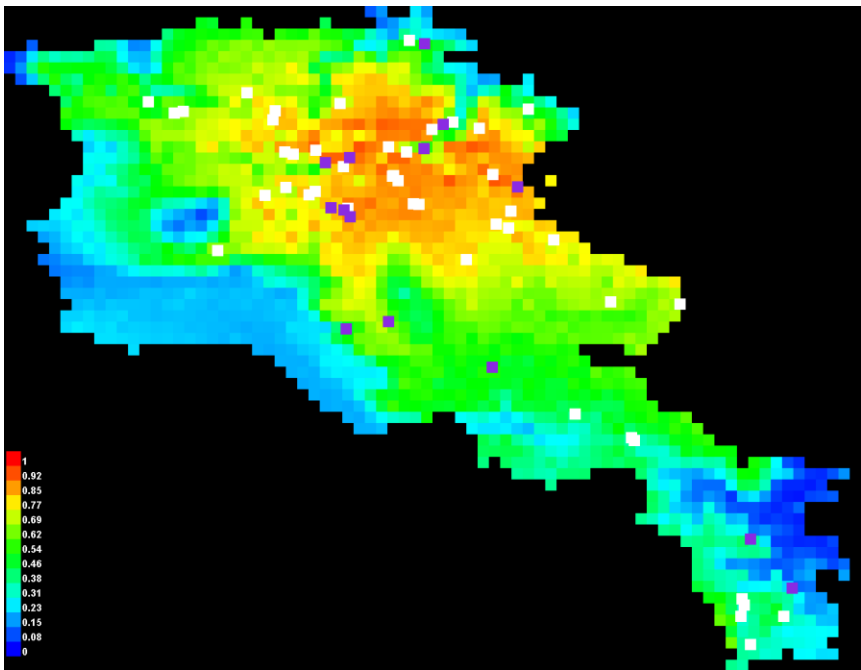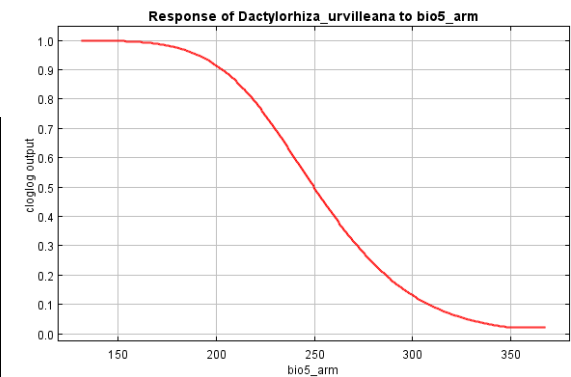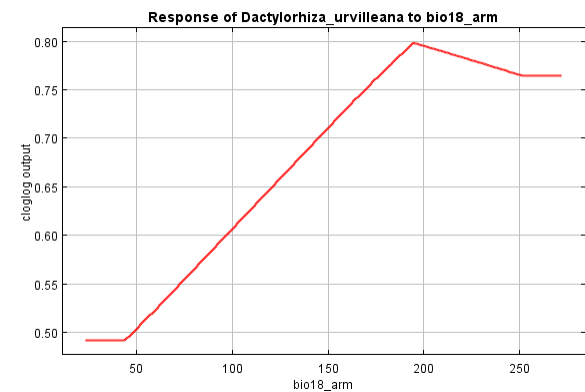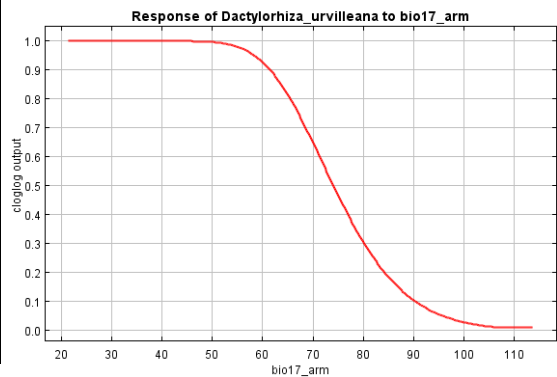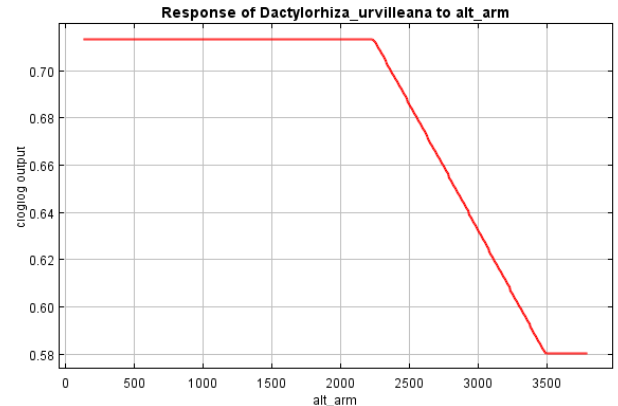

Supplement: s1 [file s1]
