# Supplementary material
Source: MDPI journal article supplement (https://www.mdpi.com/1424-2818/13/12/624)
Supplement: s1 [file s1]

**Table S3.** Principal Component Analysis results showing the rotation values for the first four Principal Components (PC) and their corresponding bioclimatic variables. In parentheses are the proportion of variance values for each PC.

| <i>Variable</i>                             | <i>Tag</i> | <i>PC1</i><br>(0.54) | <i>PC2</i><br>(0.24) | <i>PC3</i><br>(0.12) | <i>PC4</i><br>(0.04) |
|---------------------------------------------|------------|----------------------|----------------------|----------------------|----------------------|
| <i>Altitude</i>                             | alt        | -0.21                | -0.30                | -0.12                | 0.11                 |
| <i>Mean annual temperature</i>              | bio1       | 0.27                 | 0.17                 | 0.13                 | -0.06                |
| <i>Mean diurnal range</i>                   | bio2       | -0.19                | 0.04                 | -0.35                | -0.44                |
| <i>Isolthermality</i>                       | bio3       | -0.24                | 0.25                 | -0.12                | 0.06                 |
| <i>Temperature seasonality</i>              | bio4       | 0.24                 | -0.25                | -0.03                | -0.30                |
| <i>Max temperature of warmest month</i>     | bio5       | 0.29                 | 0.09                 | 0.08                 | -0.12                |
| <i>Minimum temperature of coldest month</i> | bio6       | 0.25                 | 0.23                 | 0.16                 | 0.07                 |
| <i>Temperature of annual range</i>          | bio7       | 0.16                 | -0.31                | -0.16                | -0.46                |
| <i>Mean temperature of wettest quarter</i>  | bio8       | 0.23                 | 0.20                 | 0.22                 | -0.08                |
| <i>Mean temperature of driest quarter</i>   | bio9       | 0.23                 | -0.09                | 0.01                 | -0.25                |
| <i>Mean temperature of warmest quarter</i>  | bio10      | 0.29                 | 0.12                 | 0.11                 | -0.09                |
| <i>Mean temperature of coldest quarter</i>  | bio11      | 0.25                 | 0.25                 | 0.15                 | 0.02                 |
| <i>Total precipitation</i>                  | bio12      | -0.26                | 0.14                 | 0.27                 | -0.08                |
| <i>Precipitation of wettest month</i>       | bio13      | -0.27                | 0.14                 | 0.19                 | -0.12                |
| <i>Precipitation of driest month</i>        | bio14      | -0.14                | -0.29                | 0.36                 | -0.07                |
| <i>Precipitation seasonality</i>            | bio15      | -0.16                | 0.25                 | -0.08                | -0.51                |
| <i>Precipitation of wettest quarter</i>     | bio16      | -0.26                | 0.16                 | 0.22                 | -0.14                |
| <i>Precipitation of driest quarter</i>      | bio17      | -0.14                | -0.22                | 0.45                 | -0.02                |
| <i>Precipitation of warmest quarter</i>     | bio18      | -0.18                | 0.32                 | 0.17                 | -0.24                |
| <i>Precipitation of coldest quarter</i>     | bio19      | 0.00                 | -0.33                | 0.41                 | -0.18                |
