# Supplementary material
Source: MDPI journal article supplement (https://www.mdpi.com/1424-2818/13/12/624)
Supplement: s1 [file s1]

**Table S2. Table of species presence within PA network in Armenia.** A value of 1 means that the species was found within the PA site, a value of 0 means that there were no occurrence datapoints found within the PA site. Data on species presence is taken from herbarium records, field observations and GBIF records. Species names is derived from the World Checklist of Vascular Plants and the Plants of the World Online database. PA network names are derived from the World Database for Protected Areas (accessed September 2021).

| Accepted name                                                                                  | Akhnabat Yew Grove | Arevik    | Arzakan-Meghradzor | Boghaqar | Dilijan   | Gandzakar | Goris    | Gyulagarak | Herher Open Woodland | Ijevan    | Jermuk Forest | Juniper Open Woodland | Khosrov Forest | Lake Arpi | Margahovit | Plane Grove | Sevan    | Shikahogh | Zangezur | Zikatar  | Total in PA |
|------------------------------------------------------------------------------------------------|--------------------|-----------|--------------------|----------|-----------|-----------|----------|------------|----------------------|-----------|---------------|-----------------------|----------------|-----------|------------|-------------|----------|-----------|----------|----------|-------------|
| <i>Anacamptis coriophora</i> (L.) R.M.Bateman, Pridgeon & M.W.Chase                            | 0                  | 0         | 1                  | 0        | 1         | 0         | 0        | 0          | 0                    | 1         | 0             | 0                     | 1              | 0         | 0          | 0           | 0        | 0         | 0        | 0        | 4           |
| <i>Anacamptis morio</i> (L.) R.M.Bateman, Pridgeon & M.W.Chase                                 | 0                  | 0         | 0                  | 0        | 0         | 0         | 0        | 0          | 0                    | 0         | 0             | 0                     | 0              | 0         | 0          | 0           | 0        | 0         | 0        | 0        | 0           |
| <i>Anacamptis palustris</i> (Jacq.) R.M.Bateman, Pridgeon & M.W.Chase                          | 0                  | 0         | 0                  | 0        | 0         | 0         | 0        | 0          | 0                    | 0         | 0             | 0                     | 0              | 0         | 0          | 0           | 0        | 0         | 0        | 0        | 0           |
| <i>Anacamptis pyramidalis</i> (L.) Rich.                                                       | 0                  | 1         | 0                  | 0        | 1         | 0         | 0        | 0          | 0                    | 1         | 0             | 0                     | 1              | 0         | 0          | 0           | 0        | 1         | 0        | 0        | 5           |
| <i>Cephalanthera damasonium</i> Mill.                                                          | 0                  | 1         | 0                  | 0        | 1         | 0         | 0        | 0          | 0                    | 1         | 0             | 0                     | 0              | 0         | 0          | 0           | 0        | 1         | 0        | 0        | 4           |
| <i>Cephalanthera kotschyana</i> Renz & Taubenheim                                              | 0                  | 0         | 0                  | 0        | 1         | 0         | 0        | 0          | 0                    | 0         | 0             | 0                     | 0              | 0         | 0          | 0           | 0        | 1         | 0        | 0        | 2           |
| <i>Cephalanthera kurdica</i> Bornm. ex Kraenzl.                                                | 0                  | 1         | 0                  | 0        | 0         | 0         | 0        | 0          | 0                    | 0         | 0             | 0                     | 0              | 0         | 0          | 0           | 0        | 0         | 0        | 0        | 1           |
| <i>Cephalanthera longifolia</i> (L.) Fritsch                                                   | 0                  | 0         | 0                  | 0        | 1         | 0         | 0        | 0          | 0                    | 1         | 0             | 0                     | 0              | 0         | 0          | 0           | 0        | 1         | 0        | 0        | 3           |
| <i>Cephalanthera rubra</i> (L.) Rich.                                                          | 0                  | 1         | 0                  | 0        | 1         | 0         | 0        | 0          | 0                    | 1         | 0             | 0                     | 0              | 0         | 0          | 0           | 0        | 1         | 0        | 1        | 5           |
| <i>Corallorhiza trifida</i> Chätel.                                                            | 0                  | 0         | 0                  | 0        | 0         | 0         | 0        | 0          | 0                    | 0         | 0             | 0                     | 0              | 0         | 1          | 0           | 0        | 0         | 0        | 0        | 1           |
| <i>Dactylorhiza euxina</i> (Nevski) Czerep.                                                    | 0                  | 1         | 0                  | 0        | 1         | 0         | 0        | 0          | 0                    | 0         | 0             | 0                     | 0              | 1         | 0          | 0           | 1        | 0         | 1        | 0        | 5           |
| <i>Dactylorhiza iberica</i> (M.Bieb. ex Willd.) Soó                                            | 0                  | 0         | 0                  | 0        | 0         | 0         | 0        | 0          | 0                    | 0         | 0             | 0                     | 0              | 0         | 0          | 0           | 0        | 0         | 0        | 0        | 0           |
| <i>Dactylorhiza incarnata</i> (L.) Soó                                                         | 0                  | 0         | 0                  | 0        | 0         | 0         | 0        | 0          | 0                    | 0         | 0             | 0                     | 0              | 0         | 0          | 0           | 0        | 0         | 0        | 0        | 0           |
| <i>Dactylorhiza incarnata subsp. allicica</i> (Klinge)                                         | 0                  | 1         | 0                  | 1        | 0         | 0         | 0        | 0          | 0                    | 0         | 1             | 0                     | 1              | 0         | 0          | 0           | 1        | 0         | 1        | 0        | 6           |
| <i>Dactylorhiza romana</i> (Sebast.) Soó                                                       | 0                  | 1         | 0                  | 0        | 0         | 0         | 0        | 0          | 0                    | 0         | 0             | 0                     | 0              | 0         | 0          | 0           | 0        | 0         | 0        | 0        | 1           |
| <i>Dactylorhiza romana subsp. georgica</i> (Klinge)                                            | 0                  | 1         | 0                  | 0        | 0         | 0         | 0        | 0          | 0                    | 0         | 0             | 0                     | 0              | 0         | 0          | 0           | 0        | 0         | 0        | 0        | 1           |
| <i>Dactylorhiza salina</i> (Turcz. ex Lindl.) Soó                                              | 0                  | 0         | 0                  | 0        | 0         | 0         | 0        | 0          | 0                    | 0         | 0             | 0                     | 0              | 0         | 0          | 0           | 0        | 0         | 0        | 0        | 0           |
| <i>Dactylorhiza sambucina</i> (L.) Soó                                                         | 0                  | 0         | 0                  | 0        | 0         | 0         | 0        | 0          | 0                    | 0         | 0             | 0                     | 0              | 0         | 0          | 0           | 0        | 0         | 0        | 0        | 0           |
| <i>Dactylorhiza urvilleana</i> (Steud.) H.Baumann & Künkele                                    | 0                  | 1         | 1                  | 0        | 1         | 0         | 0        | 1          | 0                    | 1         | 0             | 0                     | 0              | 0         | 1          | 0           | 1        | 0         | 0        | 0        | 7           |
| <i>Dactylorhiza viridis</i> (L.) R.M.Bateman, Pridgeon & M.W.Chase                             | 0                  | 0         | 0                  | 0        | 0         | 0         | 0        | 0          | 0                    | 0         | 0             | 0                     | 0              | 0         | 0          | 0           | 0        | 0         | 0        | 0        | 0           |
| <i>Epipactis atrorubens</i> (Hoffm.) Besser                                                    | 0                  | 0         | 0                  | 0        | 0         | 0         | 0        | 0          | 0                    | 0         | 0             | 0                     | 0              | 0         | 0          | 0           | 0        | 0         | 0        | 0        | 0           |
| <i>Epipactis helleborine</i> (L.) Crantz                                                       | 0                  | 0         | 0                  | 0        | 1         | 1         | 1        | 1          | 0                    | 0         | 0             | 0                     | 0              | 0         | 0          | 1           | 1        | 1         | 0        | 0        | 7           |
| <i>Epipactis persica</i> (Soó) Hausskn. ex Nannf.                                              | 0                  | 0         | 0                  | 0        | 1         | 0         | 0        | 0          | 0                    | 1         | 0             | 0                     | 1              | 0         | 0          | 0           | 0        | 0         | 0        | 0        | 3           |
| <i>Epipactis palustris</i> (L.) Crantz                                                         | 0                  | 0         | 0                  | 0        | 0         | 0         | 0        | 0          | 0                    | 0         | 0             | 0                     | 0              | 0         | 0          | 0           | 1        | 0         | 0        | 0        | 1           |
| <i>Epipactis veratrifolia</i> Boiss. & Hohen.                                                  | 0                  | 0         | 0                  | 0        | 0         | 0         | 0        | 0          | 0                    | 0         | 0             | 0                     | 0              | 0         | 0          | 0           | 0        | 0         | 0        | 0        | 0           |
| <i>Epipogium aphyllum</i> Sw.                                                                  | 0                  | 0         | 0                  | 0        | 1         | 0         | 0        | 0          | 0                    | 0         | 0             | 0                     | 0              | 0         | 0          | 0           | 0        | 0         | 0        | 0        | 1           |
| <i>Gymnadenia conopsea</i> (L.) R.Br.                                                          | 0                  | 0         | 1                  | 0        | 1         | 0         | 0        | 0          | 0                    | 1         | 0             | 0                     | 0              | 1         | 1          | 0           | 0        | 1         | 0        | 0        | 6           |
| <i>Limodorum abortivum</i> (L.) Sw.                                                            | 0                  | 0         | 0                  | 0        | 1         | 0         | 0        | 0          | 0                    | 0         | 0             | 0                     | 0              | 0         | 0          | 0           | 0        | 1         | 0        | 0        | 2           |
| <i>Neotinea tridentata</i> (Scop.) R.M.Bateman, Pridgeon & M.W.Chase                           | 0                  | 1         | 0                  | 0        | 0         | 0         | 0        | 0          | 0                    | 0         | 0             | 0                     | 0              | 0         | 0          | 0           | 0        | 1         | 0        | 0        | 2           |
| <i>Neottia nidus-avis</i> (L.) Rich.                                                           | 1                  | 1         | 1                  | 0        | 1         | 0         | 0        | 1          | 0                    | 1         | 0             | 0                     | 0              | 0         | 1          | 0           | 0        | 1         | 0        | 0        | 8           |
| <i>Neottia ovata</i> (L.) Bluff & Fingerh.                                                     | 0                  | 0         | 0                  | 0        | 0         | 0         | 0        | 0          | 0                    | 1         | 0             | 0                     | 0              | 0         | 0          | 0           | 0        | 0         | 0        | 0        | 1           |
| <i>Ophrys apifera</i> Huds.                                                                    | 0                  | 0         | 0                  | 0        | 0         | 0         | 0        | 0          | 0                    | 0         | 0             | 0                     | 0              | 0         | 0          | 0           | 0        | 0         | 0        | 0        | 0           |
| <i>Ophrys scolopax</i> Cav.                                                                    | 0                  | 0         | 0                  | 0        | 0         | 0         | 0        | 0          | 0                    | 1         | 0             | 0                     | 0              | 0         | 0          | 0           | 0        | 0         | 0        | 0        | 1           |
| <i>Ophrys scolopax subsp. cornuta</i> (Steven) E.G.Camus in E.G.Camus, P.Bergon & A.A.Camus    | 0                  | 1         | 0                  | 0        | 0         | 0         | 0        | 0          | 0                    | 1         | 0             | 0                     | 0              | 0         | 0          | 0           | 0        | 0         | 0        | 0        | 2           |
| <i>Ophrys sphegodes subsp. taurica</i> (Aggeenko) Soó ex Niketic & Djordjevic                  | 0                  | 0         | 0                  | 0        | 0         | 0         | 0        | 0          | 0                    | 0         | 0             | 0                     | 0              | 0         | 0          | 0           | 0        | 0         | 0        | 0        | 0           |
| <i>Orchis mascula</i> (L.) L.                                                                  | 0                  | 1         | 0                  | 0        | 1         | 0         | 0        | 0          | 1                    | 0         | 0             | 1                     | 1              | 0         | 0          | 0           | 1        | 1         | 0        | 0        | 7           |
| <i>Orchis militaris</i> L.                                                                     | 0                  | 0         | 0                  | 0        | 0         | 0         | 0        | 0          | 0                    | 0         | 0             | 0                     | 0              | 0         | 0          | 0           | 0        | 0         | 0        | 0        | 0           |
| <i>Orchis militaris subsp. stevenii</i> (Rchb.f.) B.Baumann, H.Baumann, R.Lorenz & Ruedi Peter | 0                  | 1         | 0                  | 0        | 0         | 0         | 0        | 0          | 0                    | 0         | 0             | 0                     | 0              | 0         | 0          | 0           | 0        | 0         | 0        | 0        | 1           |
| <i>Orchis punctulata</i> Steven ex Lindl.                                                      | 0                  | 1         | 0                  | 0        | 0         | 0         | 0        | 0          | 0                    | 0         | 0             | 0                     | 0              | 0         | 0          | 0           | 0        | 1         | 0        | 0        | 2           |
| <i>Orchis purpurea</i> Huds.                                                                   | 0                  | 1         | 0                  | 0        | 0         | 0         | 0        | 0          | 0                    | 1         | 0             | 0                     | 0              | 0         | 0          | 0           | 0        | 0         | 0        | 0        | 2           |
| <i>Platanthera bifolia</i> (L.) Rich.                                                          | 0                  | 0         | 0                  | 0        | 0         | 0         | 0        | 0          | 0                    | 0         | 0             | 0                     | 0              | 0         | 0          | 0           | 0        | 0         | 0        | 0        | 0           |
| <i>Platanthera chlorantha</i> (Custer) Rchb.                                                   | 0                  | 1         | 0                  | 0        | 1         | 0         | 0        | 0          | 0                    | 1         | 0             | 1                     | 1              | 0         | 0          | 0           | 0        | 1         | 0        | 0        | 6           |
| <i>Steveniella satyrioides</i> (Spreng.) Schltr.                                               | 0                  | 0         | 0                  | 0        | 0         | 0         | 0        | 0          | 0                    | 0         | 0             | 0                     | 0              | 0         | 0          | 0           | 0        | 0         | 0        | 0        | 0           |
| <i>Trautsteinera sphaerica</i> (M.Bieb.) Schltr.                                               | 0                  | 0         | 0                  | 0        | 2         | 0         | 0        | 1          | 0                    | 0         | 0             | 0                     | 0              | 6         | 0          | 0           | 0        | 0         | 0        | 0        | 9           |
| <b>Total number of species per PA</b>                                                          | <b>1</b>           | <b>17</b> | <b>4</b>           | <b>1</b> | <b>18</b> | <b>1</b>  | <b>1</b> | <b>4</b>   | <b>1</b>             | <b>14</b> | <b>1</b>      | <b>2</b>              | <b>6</b>       | <b>8</b>  | <b>4</b>   | <b>1</b>    | <b>6</b> | <b>13</b> | <b>2</b> | <b>1</b> |             |
