# Supplementary material
Source: MDPI journal article supplement (https://www.mdpi.com/1424-2818/13/12/624)
Supplement: s1 [file s1]

# Supplementary Material

**Table S1.** Table showing orchid species and subspecies found within the territory of Armenia according to field visits, herbarium material from the Herbarium of Armenia and GBIF records. Local synonym names are also included. Accepted names are based on the World Checklist of Vascular Plants and the Plants of the World Online. National status of each species is based on their local synonym name and derived from the National Red List Book of Armenia.

| Accepted species name*                                                     | Synonym                                           | Armenian<br>Red Data<br>Book | Observational data  |                                  |                                |                                 | Total |
|----------------------------------------------------------------------------|---------------------------------------------------|------------------------------|---------------------|----------------------------------|--------------------------------|---------------------------------|-------|
|                                                                            |                                                   |                              | Field<br>collection | Herbarium<br>collection<br>(ERE) | Human<br>observation<br>(GBIF) | Preserved<br>specimen<br>(GBIF) |       |
| <i>Anacamptis coriophora</i> (L.) R.M.Bateman, Pridgeon & M.W.Chase        | <i>Orchis coriophora</i> L.                       | DD                           | 1                   | 35                               |                                | 17                              | 53    |
| <i>Anacamptis morio</i> (L.) R.M.Bateman, Pridgeon & M.W.Chase             | <i>Orchis morio</i> L.                            |                              | 1                   | 1                                | 1                              |                                 | 3     |
| <i>Anacamptis palustris</i> (Jacq.) R.M.Bateman, Pridgeon & M.W.Chase      | <i>Orchis palustris</i> Jacq.                     |                              |                     | 14                               |                                |                                 | 14    |
| <i>Anacamptis pyramidalis</i> (L.) Rich.                                   |                                                   |                              | 1                   | 44                               | 7                              | 10                              | 62    |
| <i>Anacamptis papilionaceae</i> (L.) R. M. Bateman, Pridgeon & M. W. Chase | <i>Orchis papilionaceae</i> L.                    | VU                           | 1                   |                                  |                                |                                 | 1     |
| <i>Cephalanthera damasonium</i> Mill.                                      |                                                   |                              | 2                   | 25                               | 4                              | 7                               | 38    |
| <i>Cephalanthera kotschyana</i> Renz & Taubenheim                          | <i>Cephalanthera caucasica</i> Kraenzl.           |                              |                     | 3                                | 1                              |                                 | 4     |
| <i>Cephalanthera kurdica</i> Bornm. ex Kraenzl.                            |                                                   |                              |                     | 8                                |                                |                                 | 8     |
| <i>Cephalanthera longifolia</i> (L.) Fritsch                               |                                                   |                              |                     | 28                               | 6                              | 1                               | 35    |
| <i>Cephalanthera rubra</i> (L.) Rich.                                      |                                                   |                              |                     | 54                               | 18                             | 18                              | 90    |
| <i>Corallorhiza trifida</i> Châtel.                                        |                                                   |                              |                     | 1                                | 1                              |                                 | 2     |
| <i>Dactylorhiza euxina</i> (Nevski) Czerep.                                |                                                   |                              |                     | 24                               | 1                              | 2                               | 27    |
| <i>Dactylorhiza iberica</i> (M.Bieb. ex Willd.) Soó                        |                                                   |                              |                     | 12                               |                                | 1                               | 13    |
| <i>Dactylorhiza incarnata</i> (L.) Soó                                     |                                                   |                              |                     |                                  | 2                              |                                 | 2     |
| <i>Dactylorhiza incarnata subsp. cilicica</i> (Klinge)                     | <i>Dactylorhiza cataonica</i> (H.Fleischm.) Holub | CR                           |                     | 18                               |                                |                                 | 18    |
| <i>Dactylorhiza incarnata subsp. cilicica</i> (Klinge)                     | <i>Dactylorhiza chuhensis</i> Renz & Taubenheim   |                              |                     | 9                                |                                |                                 | 9     |
| <i>Dactylorhiza incarnata subsp. cilicica</i> (Klinge)                     | <i>Dactylorhiza merovensis</i> (Grossh.) Aver.    |                              |                     | 24                               |                                |                                 | 24    |

|                                                                                                    |                                                  |    |   |     |    |    |
|----------------------------------------------------------------------------------------------------|--------------------------------------------------|----|---|-----|----|----|
| <i>Dactylorhiza incarnata</i> subsp. <i>cilicica</i> (Klinge)                                      | <i>Dactylorhiza osmanica</i> (Klinge) Soó        |    |   | 1   | 4  | 5  |
| <i>Dactylorhiza incarnata</i> subsp. <i>cilicica</i> (Klinge)                                      | <i>Dactylorhiza umbrosa</i> (Kar. & Kir.) Nevski |    |   |     | 2  | 2  |
| <i>Dactylorhiza romana</i> (Sebast.) Soó                                                           |                                                  |    |   | 4   | 2  | 6  |
| <i>Dactylorhiza romana</i> subsp. <i>georgica</i> (Klinge)                                         | <i>Dactylorhiza flavescens</i> (K.Koch) Holub    |    | 1 |     |    | 1  |
| <i>Dactylorhiza salina</i> (Turcz. ex Lindl.) Soó                                                  |                                                  |    |   | 3   | 1  | 4  |
| <i>Dactylorhiza sambucina</i> (L.) Soó                                                             |                                                  |    |   |     | 4  | 4  |
| <i>Dactylorhiza urvilleana</i> (Steud.) H.Baumann & Künkele                                        |                                                  |    | 3 | 80  | 4  | 87 |
| <i>Dactylorhiza viridis</i> (L.) R.M.Bateman, Pridgeon & M.W.Chase                                 | <i>Coeloglossum viride</i> (L.) Hartm.           |    |   | 15  | 4  | 1  |
| <i>Epipactis atrorubens</i> (Hoffm.) Besser                                                        | <i>Epipactis microphylla</i> Sieber ex Nyman     | DD |   | 1   |    | 1  |
| <i>Epipactis helleborine</i> (L.) Crantz                                                           |                                                  |    |   | 27  | 2  | 29 |
| <i>Epipactis palustris</i> (L.) Crantz                                                             |                                                  |    | 1 |     |    | 1  |
| <i>Epipactis persica</i> (Soó) Hausskn. ex Nannf.                                                  |                                                  |    |   | 13  |    | 13 |
| <i>Epipactis veratrifolia</i> Boiss. & Hohen.                                                      |                                                  | DD |   | 1   |    | 1  |
| <i>Epipogium aphyllum</i> Sw.                                                                      |                                                  | EN |   | 4   | 1  | 5  |
| <i>Gymnadenia conopsea</i> (L.) R.Br.                                                              |                                                  |    |   | 80  | 2  | 7  |
| <i>Limodorum abortivum</i> (L.) Sw.                                                                |                                                  |    |   | 20  | 1  | 1  |
| <i>Neotinea tridentata</i> (Scop.) R.M.Bateman, Pridgeon & M.W.Chase                               | <i>Orchis simia</i> Vill.                        | NT | 1 | 18  | 9  | 2  |
| <i>Neotinea tridentata</i> (Scop.) R.M.Bateman, Pridgeon & M.W.Chase                               | <i>Orchis tridentata</i> Scop.                   | EN |   | 4   |    | 4  |
| <i>Neottia nidus-avis</i> (L.) Rich.                                                               |                                                  |    |   | 21  | 8  | 8  |
| <i>Neottia ovata</i> (L.) Bluff & Fingerh.                                                         | <i>Listera ovata</i> (L.) R.Br.                  | CR |   | 10  |    | 10 |
| <i>Ophrys apifera</i> Huds.                                                                        |                                                  | CR |   | 1   | 1  | 1  |
| <i>Ophrys scolopax</i> Cav.                                                                        |                                                  |    |   |     | 4  | 4  |
| <i>Ophrys scolopax</i> subsp. <i>cornuta</i> (Steven) E.G.Camus in E.G.Camus, P.Bergon & A.A.Camus | <i>Ophrys oestrifera</i> M.Bieb.                 | NT | 2 | 15  |    | 6  |
| <i>Ophrys sphegodes</i> subsp. <i>taurica</i> (Aggeenko) Soó ex Niketic & Djordjevic               | <i>Ophrys caucasica</i> Woronow                  |    | 1 | 1   |    | 2  |
| <i>Orchis mascula</i> (L.) L.                                                                      |                                                  |    | 1 | 101 | 15 | 2  |
| <i>Orchis militaris</i> L.                                                                         |                                                  |    |   |     | 2  | 2  |

|                                                                                                   |                                |    |           |            |            |  |            |              |
|---------------------------------------------------------------------------------------------------|--------------------------------|----|-----------|------------|------------|--|------------|--------------|
| <i>Orchis militaris subsp. stevenii</i> (Rchb.f.) B.Baumann, H.Baumann,<br>R.Lorenz & Ruedi Peter | <i>Orchis stevenii</i> Rchb.f. | EN |           | 3          |            |  |            | <b>3</b>     |
| <i>Orchis punctulata</i> Steven ex Lindl.                                                         |                                | VU | 6         | 14         | 4          |  |            | <b>24</b>    |
| <i>Orchis purpurea</i> Huds.                                                                      |                                |    | 2         | 15         | 3          |  |            | <b>20</b>    |
| <i>Platanthera bifolia</i> (L.) Rich.                                                             |                                |    |           |            |            |  | 3          | <b>3</b>     |
| <i>Platanthera chlorantha</i> (Custer) Rchb.                                                      |                                |    |           | 83         | 6          |  | 15         | <b>104</b>   |
| <i>Steeniola satyrioides</i> (Spreng.) Schltr.                                                    |                                | EN |           | 3          | 2          |  |            | <b>5</b>     |
| <i>Traunsteinera sphaerica</i> (M.Bieb.) Schltr.                                                  |                                |    |           | 24         |            |  |            | <b>24</b>    |
| <b>Total</b>                                                                                      |                                |    | <b>17</b> | <b>855</b> | <b>107</b> |  | <b>122</b> | <b>1,101</b> |
