# Supplementary material
Source: MDPI journal article supplement (https://www.mdpi.com/1424-2818/13/12/624)
Supplement: s1 [file s1]

**Table S4.** AICc values for model selection using regularization. MAXENT software was used to run individual species models using regularization multiplier values from 1 to 10. AICc values were calculated based on Warren and Seifert (2011). Model with the smallest AICc value for each species was selected as the most parsimonious model and taken further for analysis.

| <i>Species</i>                                | <i>Regularization value</i> |     |     |     |     |     |     |     |     |     |
|-----------------------------------------------|-----------------------------|-----|-----|-----|-----|-----|-----|-----|-----|-----|
|                                               | 1                           | 2   | 3   | 4   | 5   | 6   | 7   | 8   | 9   | 10  |
| <i>Anacamptis coriophora</i>                  | 477                         | 491 | 484 | 480 | 482 | 482 | 480 | 480 | 480 | 480 |
| <i>Cephalanthera damasonium</i>               | 313                         | 285 | 288 | 294 | 295 | 300 | 297 | 301 | 304 | 303 |
| <i>Cephalanthera longifolia</i>               | 197                         | 202 | 203 | 205 | 206 | 208 | 209 | 211 | 210 | 210 |
| <i>Cephalanthera rubra</i>                    | 640                         | 616 | 601 | 608 | 607 | 609 | 614 | 617 | 608 | 613 |
| <i>Dactylorhiza euxina</i>                    | 396                         | 299 | 303 | 300 | 300 | 302 | 300 | 300 | 300 | 300 |
| <i>Dactylorhiza incarnata subsp. cilicica</i> | 623                         | 585 | 574 | 580 | 590 | 589 | 591 | 590 | 596 | 592 |
| <i>Dactylorhiza urvilleana</i>                | 871                         | 865 | 863 | 866 | 859 | 860 | 869 | 867 | 876 | 879 |
| <i>Dactylorhiza viridis</i>                   | 207                         | 208 | 209 | 211 | 211 | 207 | 210 | 210 | 210 | 210 |
| <i>Epipactis helleborine</i>                  | 256                         | 257 | 264 | 260 | 271 | 270 | 271 | 272 | 270 | 270 |
| <i>Epipactis persica</i>                      | 163                         | 163 | 162 | 165 | 167 | 165 | 165 | 165 | 165 | 165 |
| <i>Epipactis persica</i>                      | 163                         | 163 | 162 | 165 | 167 | 165 | 165 | 165 | 165 | 165 |
| <i>Gymnadenia conopsea</i>                    | 472                         | 461 | 459 | 459 | 461 | 463 | 460 | 459 | 465 | 462 |
| <i>Limodorum abortivum</i>                    | 192                         | 193 | 194 | 197 | 199 | 200 | 196 | 203 | 202 | 204 |
| <i>Neotinea tridentata</i>                    | 281                         | 280 | 287 | 290 | 291 | 293 | 293 | 293 | 290 | 300 |
| <i>Neottia nidus-avis</i>                     | 281                         | 270 | 287 | 290 | 294 | 293 | 293 | 299 | 288 | 300 |
| <i>Ophrys scolopax subsp. cornuta</i>         | 169                         | 169 | 170 | 170 | 173 | 175 | 177 | 172 | 171 | 180 |
| <i>Orchis mascula</i>                         | 824                         | 813 | 820 | 829 | 830 | 828 | 825 | 824 | 827 | 827 |
| <i>Orchis punctulata</i>                      | 170                         | 180 | 176 | 183 | 180 | 182 | 180 | 180 | 180 | 180 |
| <i>Orchis purpurea</i>                        | 161                         | 160 | 160 | 161 | 162 | 165 | 165 | 165 | 165 | 165 |
| <i>Platanthera chlorantha</i>                 | 462                         | 450 | 447 | 448 | 452 | 450 | 450 | 450 | 450 | 450 |
| <i>Traunsteinera sphaerica</i>                | 135                         | 136 | 136 | 137 | 135 | 135 | 135 | 135 | 135 | 135 |
